# Supplementary material for: Signal Propagation in Protein Interaction Network during Colorectal Cancer Progression
Source: Hindawi journal article supplement (doi:10.1155/2013/287019), 2013-01-01
Supplement: f1 [file 287019.f1.pdf]

Table S1 - The 158 early stage biomarkers

| Order | Name         | mRMR Score |
|-------|--------------|------------|
| 1     | CASP1        | 0.107      |
| 2     | ZNF552       | 0.086      |
| 3     | WDYHV1       | 0.082      |
| 4     | MAVS         | 0.082      |
| 5     | MBNL2        | 0.074      |
| 6     | CHRNA3       | 0.069      |
| 7     | PACS2        | 0.069      |
| 8     | SLC11A1      | 0.065      |
| 9     | SOX11        | 0.064      |
| 10    | ZC3H12A      | 0.063      |
| 11    | LGALS8       | 0.06       |
| 12    | SYK          | 0.06       |
| 13    | TTC7B        | 0.059      |
| 14    | CHST2        | 0.057      |
| 15    | FAM12B       | 0.055      |
| 16    | MBTD1        | 0.056      |
| 17    | MMP8         | 0.052      |
| 18    | PRKCDBP      | 0.052      |
| 19    | NTRK1        | 0.051      |
| 20    | CDKN2A       | 0.05       |
| 21    | PQBP1        | 0.049      |
| 22    | SERPINB2     | 0.049      |
| 23    | C18orf1      | 0.049      |
| 24    | SLC17A7      | 0.047      |
| 25    | LRP4         | 0.046      |
| 26    | METTL8       | 0.045      |
| 27    | RB1CC1       | 0.045      |
| 28    | TET3         | 0.045      |
| 29    | SALL2        | 0.045      |
| 30    | DDX47        | 0.044      |
| 31    | SLC22A5      | 0.044      |
| 32    | FAM20B       | 0.045      |
| 33    | CDON         | 0.044      |
| 34    | SRBD1        | 0.045      |
| 35    | CCL20        | 0.045      |
| 36    | NKAIN2       | 0.043      |
| 37    | LOC100130175 | 0.043      |
| 38    | SAV1         | 0.043      |
| 39    | ANKS4B       | 0.043      |

|    |              |       |
|----|--------------|-------|
| 40 | SART3        | 0.043 |
| 41 | TSPYL4       | 0.042 |
| 42 | C4orf29      | 0.043 |
| 43 | PSMB9        | 0.043 |
| 44 | CCDC83       | 0.042 |
| 45 | CPA2         | 0.042 |
| 46 | TMPRSS6      | 0.042 |
| 47 | GPR177       | 0.042 |
| 48 | UBE2CBP      | 0.041 |
| 49 | SNAPC3       | 0.041 |
| 50 | BAX          | 0.041 |
| 51 | FCRL5        | 0.041 |
| 52 | BEND6        | 0.04  |
| 53 | PRF1         | 0.04  |
| 54 | LEPRE1       | 0.041 |
| 55 | SLC22A18     | 0.041 |
| 56 | KRCC1        | 0.04  |
| 57 | CCL7         | 0.04  |
| 58 | GADD45GIP1   | 0.04  |
| 59 | DIRAS3       | 0.04  |
| 60 | TTC17        | 0.039 |
| 61 | KDM4B        | 0.039 |
| 62 | SCEL         | 0.038 |
| 63 | LGI1         | 0.038 |
| 64 | C4orf31      | 0.037 |
| 65 | EBI3         | 0.037 |
| 66 | TXNRD3       | 0.037 |
| 67 | GAS1         | 0.037 |
| 68 | GRIN3A       | 0.037 |
| 69 | RFXAP        | 0.036 |
| 70 | AKR1C3       | 0.036 |
| 71 | RNF43        | 0.037 |
| 72 | MRPL51       | 0.036 |
| 73 | HIATL1       | 0.036 |
| 74 | PIGR         | 0.036 |
| 75 | DIS3L2       | 0.036 |
| 76 | ZPBP         | 0.036 |
| 77 | LOC90925     | 0.035 |
| 78 | RPS2         | 0.036 |
| 79 | LOC100129502 | 0.035 |
| 80 | IL26         | 0.035 |

|     |          |       |
|-----|----------|-------|
| 81  | UAP1L1   | 0.034 |
| 82  | HSPB1    | 0.035 |
| 83  | IGKC     | 0.035 |
| 84  | SAMD11   | 0.034 |
| 85  | VIP      | 0.034 |
| 86  | KIAA0562 | 0.034 |
| 87  | MAGT1    | 0.034 |
| 88  | UBXN7    | 0.033 |
| 89  | PTGER1   | 0.033 |
| 90  | CRB3     | 0.033 |
| 91  | ATL3     | 0.033 |
| 92  | IGLV4-60 | 0.033 |
| 93  | OLIG1    | 0.033 |
| 94  | C6orf211 | 0.033 |
| 95  | COL8A1   | 0.033 |
| 96  | MEG3     | 0.033 |
| 97  | ANGPTL4  | 0.033 |
| 98  | IGHD     | 0.032 |
| 99  | ADAMTS16 | 0.032 |
| 100 | OCA2     | 0.032 |
| 101 | FASTKD1  | 0.032 |
| 102 | CXCL14   | 0.032 |
| 103 | SPATS2   | 0.032 |
| 104 | TRAV8-3  | 0.032 |
| 105 | BTBD3    | 0.032 |
| 106 | JHDM1D   | 0.032 |
| 107 | RABGEF1  | 0.032 |
| 108 | PARVA    | 0.032 |
| 109 | CCDC102B | 0.032 |
| 110 | IGJ      | 0.032 |
| 111 | DYDC1    | 0.032 |
| 112 | SLC2A3   | 0.032 |
| 113 | GLTPD1   | 0.032 |
| 114 | OXA1L    | 0.031 |
| 115 | PRKAA2   | 0.031 |
| 116 | C19orf61 | 0.031 |
| 117 | TATDN2   | 0.031 |
| 118 | KATNAL1  | 0.031 |
| 119 | ZNF91    | 0.031 |
| 120 | FAM53B   | 0.031 |
| 121 | CYP4F2   | 0.031 |

|     |           |       |
|-----|-----------|-------|
| 122 | ATP2B4    | 0.031 |
| 123 | C6orf154  | 0.031 |
| 124 | CD79A     | 0.031 |
| 125 | EEF1DP3   | 0.031 |
| 126 | COL4A5    | 0.03  |
| 127 | PARG      | 0.03  |
| 128 | RNF4      | 0.03  |
| 129 | NS3BP     | 0.03  |
| 130 | PLEKHB1   | 0.03  |
| 131 | MAP7D1    | 0.03  |
| 132 | COBLL1    | 0.03  |
| 133 | GPR85     | 0.029 |
| 134 | HLA-DQB2  | 0.029 |
| 135 | PITX1     | 0.029 |
| 136 | ALKBH6    | 0.029 |
| 137 | C2orf61   | 0.029 |
| 138 | SATB2     | 0.029 |
| 139 | GMCL1     | 0.029 |
| 140 | APOBEC1   | 0.029 |
| 141 | NOP10     | 0.028 |
| 142 | PLXNB3    | 0.028 |
| 143 | PTGER3    | 0.028 |
| 144 | WBSCR27   | 0.028 |
| 145 | LOC339290 | 0.028 |
| 146 | ZNF551    | 0.028 |
| 147 | EEF1B2    | 0.028 |
| 148 | LPXN      | 0.028 |
| 149 | UBQLN2    | 0.028 |
| 150 | ACSF2     | 0.028 |
| 151 | CEACAM1   | 0.028 |
| 152 | NFIB      | 0.028 |
| 153 | PIKFYVE   | 0.028 |
| 154 | SPATA12   | 0.028 |
| 155 | DYNLRB2   | 0.028 |
| 156 | PGRMC1    | 0.028 |
| 157 | C3orf58   | 0.028 |
| 158 | ZNF485    | 0.028 |

Table S2 - The 284 late stage biomarkers

| Order | Name        | mRMR Score |
|-------|-------------|------------|
| 1     | GFPT1       | 0.116      |
| 2     | LOC402778   | 0.082      |
| 3     | ANP32E      | 0.077      |
| 4     | IKBKE       | 0.058      |
| 5     | LOC400654   | 0.062      |
| 6     | FCGR3B      | 0.06       |
| 7     | FLJ14107    | 0.056      |
| 8     | HOMEZ       | 0.056      |
| 9     | FZD8        | 0.057      |
| 10    | KCNQ2       | 0.05       |
| 11    | PIK3AP1     | 0.048      |
| 12    | TMCC3       | 0.046      |
| 13    | STAG3       | 0.047      |
| 14    | CRLS1       | 0.047      |
| 15    | LYRM5       | 0.047      |
| 16    | C14orf159   | 0.047      |
| 17    | hCG_1820661 | 0.047      |
| 18    | SNAPIN      | 0.046      |
| 19    | CCDC68      | 0.047      |
| 20    | SSR1        | 0.044      |
| 21    | ALPK3       | 0.044      |
| 22    | TMEM99      | 0.045      |
| 23    | LRCH3       | 0.044      |
| 24    | ZNF827      | 0.041      |
| 25    | C9orf152    | 0.041      |
| 26    | FBR3        | 0.04       |
| 27    | ASF1A       | 0.04       |
| 28    | VNN2        | 0.042      |
| 29    | AQP10       | 0.04       |
| 30    | GDPD3       | 0.041      |
| 31    | MPPED1      | 0.039      |
| 32    | MTERFD2     | 0.037      |
| 33    | SAA3P       | 0.037      |
| 34    | SOCS7       | 0.038      |
| 35    | SMAD7       | 0.037      |
| 36    | UQCC        | 0.037      |
| 37    | ZZZ3        | 0.036      |
| 38    | TAP2        | 0.036      |
| 39    | LMTK3       | 0.035      |

|    |          |       |
|----|----------|-------|
| 40 | ANKRD29  | 0.035 |
| 41 | PPP1R3A  | 0.035 |
| 42 | COPA     | 0.035 |
| 43 | MTMR12   | 0.035 |
| 44 | MID1     | 0.035 |
| 45 | MARCKS   | 0.035 |
| 46 | CABP5    | 0.034 |
| 47 | CD55     | 0.034 |
| 48 | ABHD15   | 0.034 |
| 49 | KIAA0182 | 0.034 |
| 50 | SPINK5   | 0.033 |
| 51 | ITGA6    | 0.033 |
| 52 | EPPK1    | 0.033 |
| 53 | KIF1A    | 0.032 |
| 54 | ZFHX3    | 0.033 |
| 55 | PQLC1    | 0.032 |
| 56 | CTSA     | 0.033 |
| 57 | RNF138   | 0.032 |
| 58 | GSDMD    | 0.031 |
| 59 | FPR1     | 0.031 |
| 60 | ATP6V1E2 | 0.031 |
| 61 | CAMK2B   | 0.031 |
| 62 | ZMYM4    | 0.031 |
| 63 | GPR19    | 0.031 |
| 64 | ZNF818P  | 0.031 |
| 65 | TBCKL    | 0.03  |
| 66 | TM2D2    | 0.03  |
| 67 | SHANK2   | 0.03  |
| 68 | RUNDC3A  | 0.03  |
| 69 | CLEC2D   | 0.03  |
| 70 | C1orf14  | 0.03  |
| 71 | AMMECR1L | 0.03  |
| 72 | DEFA5    | 0.03  |
| 73 | C17orf76 | 0.029 |
| 74 | TMC2     | 0.029 |
| 75 | SERPINB4 | 0.029 |
| 76 | KLRD1    | 0.029 |
| 77 | SLC38A9  | 0.029 |
| 78 | SOS2     | 0.029 |
| 79 | CXXC4    | 0.029 |
| 80 | ADAM9    | 0.029 |

|     |           |       |
|-----|-----------|-------|
| 81  | ARHGEF19  | 0.029 |
| 82  | AVPI1     | 0.029 |
| 83  | NSUN7     | 0.029 |
| 84  | MBNL3     | 0.029 |
| 85  | APBB1IP   | 0.028 |
| 86  | MMGT1     | 0.028 |
| 87  | HAVCR1    | 0.028 |
| 88  | VPS4B     | 0.028 |
| 89  | C8orf48   | 0.028 |
| 90  | SLC16A6   | 0.028 |
| 91  | TOX2      | 0.028 |
| 92  | CYP2J2    | 0.028 |
| 93  | ABCB1     | 0.028 |
| 94  | DYNC1I2   | 0.028 |
| 95  | SYTL3     | 0.027 |
| 96  | CGGBP1    | 0.027 |
| 97  | ORC3L     | 0.027 |
| 98  | HMOX1     | 0.027 |
| 99  | TFCP2     | 0.026 |
| 100 | C20orf62  | 0.027 |
| 101 | LOC730184 | 0.027 |
| 102 | C9orf4    | 0.027 |
| 103 | A1CF      | 0.027 |
| 104 | IRF1      | 0.027 |
| 105 | ARHGEF1   | 0.026 |
| 106 | C20orf7   | 0.026 |
| 107 | TREML1    | 0.026 |
| 108 | TNFRSF18  | 0.026 |
| 109 | MTMR3     | 0.026 |
| 110 | FAIM3     | 0.026 |
| 111 | NEB       | 0.026 |
| 112 | TNFRSF1B  | 0.026 |
| 113 | RNFT1     | 0.026 |
| 114 | SUV420H1  | 0.026 |
| 115 | AARSD1    | 0.026 |
| 116 | RXRB      | 0.026 |
| 117 | ASB6      | 0.025 |
| 118 | PRO2012   | 0.025 |
| 119 | SCML1     | 0.026 |
| 120 | PREPL     | 0.026 |
| 121 | RPRM      | 0.025 |

|     |              |       |
|-----|--------------|-------|
| 122 | LOC100130460 | 0.025 |
| 123 | PKP2         | 0.025 |
| 124 | EDN3         | 0.025 |
| 125 | ASS1         | 0.025 |
| 126 | ITGAD        | 0.025 |
| 127 | C6orf217     | 0.025 |
| 128 | GFER         | 0.025 |
| 129 | SLC39A14     | 0.025 |
| 130 | TLL7         | 0.024 |
| 131 | UPP1         | 0.025 |
| 132 | LYSMD2       | 0.024 |
| 133 | CD177        | 0.024 |
| 134 | TUBGCP4      | 0.024 |
| 135 | RNF215       | 0.024 |
| 136 | ACCN2        | 0.024 |
| 137 | GRSF1        | 0.024 |
| 138 | SLA          | 0.024 |
| 139 | SOX8         | 0.024 |
| 140 | CCDC127      | 0.024 |
| 141 | ZCCHC2       | 0.024 |
| 142 | KANK4        | 0.023 |
| 143 | THADA        | 0.024 |
| 144 | FREM1        | 0.024 |
| 145 | C18orf10     | 0.023 |
| 146 | ETV6         | 0.023 |
| 147 | MYCN         | 0.023 |
| 148 | PITPNA       | 0.023 |
| 149 | RASGEF1B     | 0.023 |
| 150 | SLCO1A2      | 0.023 |
| 151 | TAX1BP3      | 0.023 |
| 152 | CPA6         | 0.023 |
| 153 | FAM181A      | 0.023 |
| 154 | C8G          | 0.022 |
| 155 | LOC100130522 | 0.022 |
| 156 | PLUNC        | 0.022 |
| 157 | RBM39        | 0.022 |
| 158 | ZAP70        | 0.022 |
| 159 | LOC339539    | 0.022 |
| 160 | NAMPT        | 0.022 |
| 161 | NGB          | 0.022 |
| 162 | ATP6V1E1     | 0.022 |



|     |              |       |
|-----|--------------|-------|
| 163 | LOC729991    | 0.022 |
| 164 | RNF4         | 0.022 |
| 165 | PPAPDC1B     | 0.022 |
| 166 | LOC388210    | 0.022 |
| 167 | CCL18        | 0.022 |
| 168 | HRAS         | 0.022 |
| 169 | MORC4        | 0.021 |
| 170 | C9orf169     | 0.021 |
| 171 | AADA2L2      | 0.021 |
| 172 | SCFD2        | 0.021 |
| 173 | LOC283731    | 0.021 |
| 174 | C14orf53     | 0.021 |
| 175 | PKIB         | 0.021 |
| 176 | THEMIS       | 0.021 |
| 177 | SLC25A11     | 0.021 |
| 178 | LTF          | 0.021 |
| 179 | LOC153577    | 0.021 |
| 180 | ATAD1        | 0.021 |
| 181 | F2           | 0.021 |
| 182 | HCN1         | 0.021 |
| 183 | ST3GAL1      | 0.021 |
| 184 | KIAA0947     | 0.021 |
| 185 | LOC84740     | 0.021 |
| 186 | BRAF         | 0.021 |
| 187 | ENPP3        | 0.02  |
| 188 | LOC100130275 | 0.02  |
| 189 | ESRRG        | 0.02  |
| 190 | SLC4A9       | 0.02  |
| 191 | RASGRP2      | 0.02  |
| 192 | NAT15        | 0.02  |
| 193 | DNAJB8       | 0.02  |
| 194 | LOC441242    | 0.02  |
| 195 | PSMB3        | 0.02  |
| 196 | SLC39A2      | 0.02  |
| 197 | TRIM47       | 0.02  |
| 198 | CRYZ         | 0.02  |
| 199 | C15orf33     | 0.02  |
| 200 | C2orf64      | 0.02  |
| 201 | CD2          | 0.02  |
| 202 | CEP57        | 0.02  |
| 203 | POLR2C       | 0.02  |

|     |              |       |
|-----|--------------|-------|
| 204 | MCM3APAS     | 0.02  |
| 205 | MYEF2        | 0.02  |
| 206 | TTC15        | 0.02  |
| 207 | B3GNT7       | 0.02  |
| 208 | LOC100130744 | 0.02  |
| 209 | DACH2        | 0.02  |
| 210 | SLC22A15     | 0.02  |
| 211 | GALNT1       | 0.019 |
| 212 | SEMA6C       | 0.02  |
| 213 | BEX1         | 0.019 |
| 214 | MTMR8        | 0.019 |
| 215 | RBM41        | 0.019 |
| 216 | GDNF         | 0.019 |
| 217 | C1orf103     | 0.019 |
| 218 | C1orf161     | 0.019 |
| 219 | MMD          | 0.019 |
| 220 | PURB         | 0.019 |
| 221 | SEMA4B       | 0.019 |
| 222 | ANKRD28      | 0.019 |
| 223 | MYCL1        | 0.019 |
| 224 | HLA-DRA      | 0.019 |
| 225 | CCDC136      | 0.019 |
| 226 | ZNF10        | 0.019 |
| 227 | HPS5         | 0.019 |
| 228 | ESX1         | 0.019 |
| 229 | C7orf13      | 0.019 |
| 230 | NECAB1       | 0.019 |
| 231 | SEC31B       | 0.019 |
| 232 | SP5          | 0.019 |
| 233 | ZC3H15       | 0.019 |
| 234 | CCDC153      | 0.019 |
| 235 | LOC401913    | 0.019 |
| 236 | SLC25A3      | 0.019 |
| 237 | LPHN2        | 0.018 |
| 238 | LMBR1L       | 0.018 |
| 239 | C19orf45     | 0.018 |
| 240 | HAS2         | 0.018 |
| 241 | OGDHL        | 0.018 |
| 242 | ZSWIM1       | 0.019 |
| 243 | ZFP14        | 0.019 |
| 244 | LOC284801    | 0.018 |

|     |           |       |
|-----|-----------|-------|
| 245 | AMELY     | 0.018 |
| 246 | SERPINA4  | 0.018 |
| 247 | MED23     | 0.018 |
| 248 | CXCL13    | 0.018 |
| 249 | SFRS15    | 0.018 |
| 250 | GATA3     | 0.018 |
| 251 | MTERFD3   | 0.018 |
| 252 | LOC283177 | 0.018 |
| 253 | CAV3      | 0.018 |
| 254 | GNA11     | 0.018 |
| 255 | LOC338758 | 0.018 |
| 256 | OCEL1     | 0.018 |
| 257 | YLPM1     | 0.018 |
| 258 | NCOA7     | 0.018 |
| 259 | CLEC4E    | 0.018 |
| 260 | RNF135    | 0.018 |
| 261 | EIF1      | 0.018 |
| 262 | FATE1     | 0.018 |
| 263 | ZFYVE9    | 0.018 |
| 264 | NUPR1     | 0.018 |
| 265 | JAK2      | 0.018 |
| 266 | IDH2      | 0.017 |
| 267 | EGFL7     | 0.017 |
| 268 | CRIM1     | 0.017 |
| 269 | PTCH2     | 0.017 |
| 270 | CASP9     | 0.017 |
| 271 | CPSF7     | 0.017 |
| 272 | NT5E      | 0.017 |
| 273 | EGF       | 0.017 |
| 274 | DRD1      | 0.017 |
| 275 | DDX3Y     | 0.017 |
| 276 | CD69      | 0.017 |
| 277 | GCLC      | 0.017 |
| 278 | UGDH      | 0.017 |
| 279 | PIK3CG    | 0.017 |
| 280 | SLITRK6   | 0.017 |
| 281 | PTPRH     | 0.017 |
| 282 | BCL11A    | 0.017 |
| 283 | FMN2      | 0.017 |
| 284 | CYTH2     | 0.017 |

Table S3 - The 632 signal propagation paths from early stage biomarkers to late stage biomarkers

| Early stage biomarker | Late stage biomarker | Pearson correlation test p value | Pearson correlation test FDR | Pearson correlation coefficient | Shortest path                                                              | Path length (sum of edge weights) | Permutation FDR |
|-----------------------|----------------------|----------------------------------|------------------------------|---------------------------------|----------------------------------------------------------------------------|-----------------------------------|-----------------|
| SLC2A3                | CD69                 | 0                                | 0                            | 0.626900758                     | SLC2A3->SP1->EP300->STAT3->IL2->CD69                                       | 204                               | 0               |
| EBI3                  | ZAP70                | 1.28E-06                         | 6.86E-05                     | 0.347236703                     | EBI3->IL27RA->STAT1->JAK2->SHC1->ZAP70                                     | 7                                 | 0               |
| CD79A                 | CD2                  | 1.74E-09                         | 2.91E-07                     | 0.424410472                     | CD79A->SYK->LCK->CD2                                                       | 6                                 | 0               |
| CD79A                 | ZAP70                | 3.46E-10                         | 7.52E-08                     | 0.440624965                     | CD79A->SYK->CBL->ZAP70                                                     | 5                                 | 0               |
| RNF4                  | RNF4                 | 0                                | 0                            | 1                               | RNF4->RNF4                                                                 | 0                                 | 0               |
| PRF1                  | IRF1                 | 6.68E-13                         | 3.94E-10                     | 0.496402019                     | PRF1->CD8A->IL2->STAT1->IRF1                                               | 9                                 | 0               |
| PRF1                  | CD2                  | 1.55E-15                         | 2.70E-12                     | 0.542713938                     | PRF1->CD8A->LCK->CD2                                                       | 8                                 | 0               |
| PSMB9                 | IRF1                 | 2.22E-16                         | 4.96E-13                     | 0.557080516                     | PSMB9->PSMB7->UCHL5->PSMD4->UBC->EGFR->STAT1->IRF1                         | 8                                 | 0               |
| PSMB9                 | CD2                  | 0                                | 0                            | 0.570225364                     | PSMB9->PSMB7->UCHL5->PSMD4->UBC->EGFR->GRB2->LCP2->LCK->CD2                | 10                                | 0               |
| PSMB9                 | ZAP70                | 1.19E-06                         | 6.44E-05                     | 0.34825263                      | PSMB9->PSMB7->UCHL5->PSMD4->UBC->EGFR->SHC1->ZAP70                         | 7                                 | 0               |
| SYK                   | SMAD7                | 3.38E-06                         | 0.000149401                  | 0.334015718                     | SYK->CBL->GRB2->ERBB2->CTNNB1->SMAD7                                       | 7                                 | 0               |
| RNF43                 | BCL11A               | 0                                | 0                            | 0.585197535                     | RNF43->AKAP8L->DHX9->SF3A2->YBX1->TP53->SP1->ESR1->NCOA2->BCL11A           | 176                               | 0               |
| CASP1                 | IRF1                 | 2.22E-16                         | 4.96E-13                     | 0.554916623                     | CASP1->IL18->IFNG->IFNGR1->STAT1->IRF1                                     | 6                                 | 0               |
| CASP1                 | JAK2                 | 7.44E-08                         | 6.59E-06                     | 0.382973243                     | CASP1->IL18->IFNG->IL2->STAT3->JAK2                                        | 6                                 | 0               |
| CASP1                 | CD2                  | 4.44E-15                         | 6.04E-12                     | 0.534985329                     | CASP1->IL18->IFNG->CD4->LCK->CD2                                           | 7                                 | 0               |
| CASP1                 | ZAP70                | 1.77E-06                         | 8.90E-05                     | 0.342930182                     | CASP1->IL18->IFNG->CD4->ZAP70                                              | 7                                 | 0               |
| CASP1                 | EGF                  | 3.63E-06                         | 0.000157382                  | 0.332993074                     | CASP1->IL18->IFNG->IL2->STAT3->EGFR->EGF                                   | 7                                 | 0               |
| SATB2                 | BCL11A               | 0                                | 0                            | 0.609237465                     | SATB2->HOXA2->CD1D->B2M->CD8A->IL2->STAT3->EP300->ESR1->NCOA2->BCL11A      | 141                               | 0               |
| CD79A                 | CXCL13               | 4.37E-13                         | 2.74E-10                     | 0.499846556                     | CD79A->SYK->LCK->CD4->CXCR4->CXCL13                                        | 16                                | 5.00E-05        |
| PRF1                  | TNFRSF1B             | 1.12E-13                         | 8.37E-11                     | 0.510627682                     | PRF1->CD8A->LCK->NFKBIA->CHUK->TRAF2->TNFRSF1B                             | 12                                | 5.00E-05        |
| CD79A                 | CD69                 | 1.10E-13                         | 8.37E-11                     | 0.510820388                     | CD79A->SYK->LCK->IL2->CD69                                                 | 23                                | 1.00E-04        |
| PRF1                  | JAK2                 | 5.10E-08                         | 4.89E-06                     | 0.387412908                     | PRF1->CD8A->IL2->STAT3->JAK2                                               | 8                                 | 1.00E-04        |
| PRF1                  | ZAP70                | 1.83E-06                         | 9.14E-05                     | 0.342458478                     | PRF1->CD8A->LCK->ZAP70                                                     | 8                                 | 1.00E-04        |
| PSMB9                 | TNFRSF1B             | 1.61E-06                         | 8.20E-05                     | 0.344206323                     | PSMB9->PSMB7->UCHL5->PSMD4->UBC->RIPK1->TRAF2->TNFRSF1B                    | 8                                 | 1.00E-04        |
| EBI3                  | TNFRSF1B             | 1.52E-06                         | 7.89E-05                     | 0.344934855                     | EBI3->IL27RA->STAT1->EP300->RELA->CHUK->TRAF2->TNFRSF1B                    | 9                                 | 0.00015         |
| PRF1                  | KLRD1                | 8.00E-13                         | 4.47E-10                     | 0.494931163                     | PRF1->CD8A->LCK->SYK->TYROBP->KLRD1                                        | 37                                | 0.00015         |
| PARVA                 | MARCKS               | 1.50E-08                         | 1.77E-06                     | 0.401323009                     | PARVA->ILK->PXN->GIT1->ARHGEF7->CDC42->PLD1->PRKCA->MARCKS                 | 10                                | 0.00015         |
| PSMB9                 | HLA-DRA              | 7.76E-13                         | 4.41E-10                     | 0.495176944                     | PSMB9->PSMB7->UCHL5->PSMD4->UBC->TP53->EP300->CREB1->CIITA->HLA-DRA        | 26                                | 0.00015         |
| EBI3                  | CD2                  | 1.64E-05                         | 0.000531378                  | 0.310977657                     | EBI3->IL27RA->STAT1->JAK2->PTPN6->LCK->CD2                                 | 10                                | 2.00E-04        |
| PARVA                 | FZD8                 | 9.84E-07                         | 5.56E-05                     | 0.350758246                     | PARVA->ILK->AKT1->GSK3B->LRP6->FZD8                                        | 10                                | 2.00E-04        |
| PSMB9                 | ITGA6                | 2.30E-09                         | 3.67E-07                     | -0.421521154                    | PSMB9->PSMB7->UCHL5->PSMD4->UBC->EGFR->SRC->PTK2->PXN->ITGA4->ITGB1->ITGA6 | 11                                | 2.00E-04        |
| CD79A                 | PIK3CG               | 2.33E-08                         | 2.53E-06                     | 0.396401296                     | CD79A->SYK->VAV1->RAC1->AKT1->PIK3CG                                       | 11                                | 0.00025         |
| GAS1                  | A1CF                 | 1.96E-13                         | 1.36E-10                     | -0.506257527                    | GAS1->SHH->GLI2->BTRC->CTNNB1->PSEN1->APP->APOE->LDLR->APOB->APOBEC1->A1CF | 46                                | 0.00025         |
| IGKC                  | CXCL13               | 4.88E-15                         | 6.37E-12                     | 0.534296591                     | IGKC->ERBB4->EGF->GRB2->LCP2->LCK->CD4->CXCR4->CXCL13                      | 43                                | 0.00025         |

|          |         |          |             |              |                                                                                            |     |          |
|----------|---------|----------|-------------|--------------|--------------------------------------------------------------------------------------------|-----|----------|
| IGKC     | CD2     | 5.38E-12 | 2.21E-09    | 0.478890918  | IGKC->ERBB4->EGF->GRB2->LCP2->LCK->CD2                                                     | 33  | 0.00025  |
| IGHD     | CD69    | 4.44E-15 | 6.04E-12    | 0.534666347  | IGHD->GHRH->GCG->LEP->STAT3->IL2->CD69                                                     | 58  | 0.00025  |
| IGHD     | CXCL13  | 1.75E-14 | 1.79E-11    | 0.524769287  | IGHD->GHRH->GCG->LEP->STAT3->IL2->IFNG->CD4->CXCR4->CXCL13                                 | 54  | 0.00025  |
| IGHD     | CD2     | 4.44E-16 | 8.68E-13    | 0.549783195  | IGHD->GHRH->GCG->LEP->STAT3->IL2->LCK->CD2                                                 | 45  | 0.00025  |
| MAVS     | HMOX1   | 6.75E-08 | 6.12E-06    | -0.384127112 | MAVS->IRF3->CREBBP->HIF1A->HMOX1                                                           | 11  | 0.00025  |
| CCL7     | HMOX1   | 1.06E-08 | 1.32E-06    | 0.405126767  | CCL7->CCR5->CD4->IFNG->IFNGR1->STAT1->EP300->HIF1A->HMOX1                                  | 13  | 0.00035  |
| EBI3     | HMOX1   | 2.55E-05 | 0.000750363 | 0.304270806  | EBI3->IL27RA->STAT1->EP300->HIF1A->HMOX1                                                   | 11  | 0.00035  |
| RABGEF1  | SOS2    | 7.78E-06 | 0.000289707 | 0.322112893  | RABGEF1->RABEP1->RAB5A->EGFR->GRB2->SOS2                                                   | 11  | 0.00035  |
| SERPINB2 | HMOX1   | 5.44E-08 | 5.17E-06    | 0.386653364  | SERPINB2->PLAU->JUN->EP300->HIF1A->HMOX1                                                   | 13  | 0.00035  |
| PRF1     | HMOX1   | 8.10E-08 | 7.01E-06    | 0.381961889  | PRF1->CD8A->IL2->STAT3->EP300->HIF1A->HMOX1                                                | 14  | 0.00035  |
| PRF1     | CXCL13  | 2.23E-10 | 5.13E-08    | 0.444897138  | PRF1->CD8A->CD4->CXCR4->CXCL13                                                             | 17  | 0.00035  |
| CASP1    | CXCL13  | 5.01E-09 | 7.13E-07    | 0.413284923  | CASP1->IL18->IFNG->CD4->CXCR4->CXCL13                                                      | 15  | 0.00035  |
| CEACAM1  | GNA11   | 6.66E-11 | 1.93E-08    | 0.456335057  | CEACAM1->PTPN11->GRB2->RET->GDNF->EDNRB->GNA11                                             | 36  | 4.00E-04 |
| GAS1     | LPHN2   | 1.29E-13 | 9.37E-11    | 0.509556943  | GAS1->SHH->BMP4->BMPR1A->SMAD1->SMAD4->TGFB1->FKBP1A->RYR1->HOMER1->SHANK2->LPHN2          | 86  | 4.00E-04 |
| PRF1     | HLA-DRA | 1.40E-10 | 3.56E-08    | 0.449362216  | PRF1->CD8A->IL2->STAT3->EP300->CREB1->CIITA->HLA-DRA                                       | 28  | 4.00E-04 |
| PSMB9    | CXCL13  | 1.52E-09 | 2.59E-07    | 0.425762805  | PSMB9->PSMB7->UCHL5->PSMD4->UBC->EGFR->GRB2->LCP2->LCK->CD4->CXCR4->CXCL13                 | 20  | 4.00E-04 |
| EBI3     | PIK3CG  | 2.14E-06 | 0.000102784 | 0.340293436  | EBI3->IL27RA->STAT1->EP300->CREB1->AKT1->PIK3CG                                            | 14  | 0.00045  |
| APOBEC1  | A1CF    | 4.37E-07 | 2.86E-05    | 0.361276568  | APOBEC1->A1CF                                                                              | 15  | 0.00045  |
| PRF1     | BEX1    | 6.52E-07 | 3.94E-05    | 0.356126438  | PRF1->CD8A->IL2->SHC1->NGFR->BEX1                                                          | 15  | 0.00045  |
| ATP2B4   | MARCKS  | 9.07E-10 | 1.67E-07    | 0.431045457  | ATP2B4->CALM1->IQGAP1->CDC42->PLD1->PRKCA->MARCKS                                          | 24  | 0.00045  |
| FCRL5    | CXCL13  | 1.73E-14 | 1.79E-11    | 0.52490935   | FCRL5->BCL9->CTNNB1->ERBB2->GRB2->LCP2->LCK->CD4->CXCR4->CXCL13                            | 100 | 0.00045  |
| IGJ      | CD69    | 1.21E-12 | 6.26E-10    | 0.491541404  | IGJ->IL2->CD69                                                                             | 74  | 0.00045  |
| SLC11A1  | HMOX1   | 1.36E-06 | 7.21E-05    | 0.34642529   | SLC11A1->ZBTB17->MYC->EP300->HIF1A->HMOX1                                                  | 15  | 5.00E-04 |
| HSPB1    | TFCP2   | 2.56E-05 | 0.000754145 | -0.304177992 | HSPB1->MAPKAPK2->MAPK14->CREB1->EP300->YY1->TFCP2                                          | 12  | 5.00E-04 |
| PTGER1   | NCOA7   | 3.10E-13 | 2.02E-10    | -0.502611276 | PTGER1->BDKRB2->KNG1->EGF->SRC->ESR1->NCOA7                                                | 103 | 5.00E-04 |
| SLC22A18 | PTPRH   | 9.68E-14 | 7.76E-11    | 0.511791911  | SLC22A18->CDKN1C->MYO1D->SRF->PTPRH                                                        | 108 | 5.00E-04 |
| PSMB9    | FCGR3B  | 1.21E-11 | 4.33E-09    | 0.471831178  | PSMB9->PSMB7->UCHL5->PSMD4->UBC->EGFR->CBL->SYK->FCER1G->FCGR3B                            | 56  | 5.00E-04 |
| AKR1C3   | A1CF    | 2.61E-12 | 1.22E-09    | 0.485060376  | AKR1C3->PTGDS->PTGS2->IL6->STAT3->SRC->CTNNB1->PSEN1->APP->APOE->LDLR->APOB->APOBEC1->A1CF | 71  | 5.00E-04 |
| IGKC     | CD69    | 3.33E-11 | 1.05E-08    | 0.462707233  | IGKC->ERBB4->EGF->SRC->STAT3->IL2->CD69                                                    | 47  | 5.00E-04 |
| CASP1    | HLA-DRA | 9.05E-10 | 1.67E-07    | 0.431075723  | CASP1->IL18->IFNG->IL2->STAT3->EP300->CREB1->CIITA->HLA-DRA                                | 26  | 5.00E-04 |
| IGJ      | CXCL13  | 2.55E-12 | 1.21E-09    | 0.485272077  | IGJ->IL2->CD8A->CD4->CXCR4->CXCL13                                                         | 70  | 5.00E-04 |
| ANGPTL4  | CYP2J2  | 5.22E-13 | 3.18E-10    | -0.498411954 | ANGPTL4->LPL->APOE->APP->APBB1->KAT5->PLA2G4A->CYP2J2                                      | 103 | 0.00055  |
| ATP2B4   | LPHN2   | 1.22E-12 | 6.26E-10    | 0.491446424  | ATP2B4->CALM1->IQGAP1->RAC1->AKT1->MTOR->FKBP1A->RYR1->HOMER1->SHANK2->LPHN2               | 93  | 0.00055  |
| CASP1    | PIK3CG  | 6.19E-06 | 0.000243487 | 0.325421407  | CASP1->IL18->IFNG->IL2->STAT3->RAC1->AKT1->PIK3CG                                          | 14  | 0.00055  |
| EBI3     | HLA-DRA | 4.63E-09 | 6.67E-07    | 0.414140884  | EBI3->IL27RA->STAT1->EP300->CREB1->CIITA->HLA-DRA                                          | 25  | 6.00E-04 |
| GAS1     | KLRD1   | 1.27E-10 | 3.31E-08    | 0.450263555  | GAS1->SHH->FGF8->FGFR1->PLCG1->CBL->SYK->TYROBP->KLRD1                                     | 42  | 6.00E-04 |
| PRF1     | FCGR3B  | 7.83E-11 | 2.19E-08    | 0.454834104  | PRF1->CD8A->LCK->SYK->FCER1G->FCGR3B                                                       | 57  | 6.00E-04 |

|          |          |          |             |              |                                                                                                    |     |          |
|----------|----------|----------|-------------|--------------|----------------------------------------------------------------------------------------------------|-----|----------|
| CASP1    | CD69     | 6.10E-08 | 5.70E-06    | 0.385308469  | CASP1->IL18->IFNG->IL2->CD69                                                                       | 21  | 6.00E-04 |
| SATB2    | RBM39    | 1.44E-12 | 7.15E-10    | 0.490071558  | SATB2->HOXA2->CD1D->B2M->CD8A->LCK->CD2->CD2BP2->SF3A2->RBM39                                      | 110 | 6.00E-04 |
| CEACAM1  | A1CF     | 1.71E-10 | 4.18E-08    | 0.447449775  | CEACAM1->PTPN11->GRB2->ERBB2->CTNNB1->PSEN1->APP->APOE->LDLR->APOB->APOBEC1->A1CF                  | 47  | 0.00065  |
| CEACAM1  | EDN3     | 7.12E-08 | 6.40E-06    | 0.383483001  | CEACAM1->PTPN11->GRB2->RET->GDNF->EDNRB->EDN3                                                      | 22  | 0.00065  |
| PTGER1   | KCNQ2    | 4.81E-12 | 2.01E-09    | 0.47984446   | PTGER1->BDKRB2->KNG1->EGF->SRC->ESR1->EP300->CREB1->CAMK2B->CALM1->KCNQ2                           | 100 | 0.00065  |
| SERPINB2 | BCL11A   | 6.83E-12 | 2.70E-09    | -0.476817364 | SERPINB2->PLAU->JUN->EP300->ESR1->NCOA2->BCL11A                                                    | 73  | 0.00065  |
| MAVS     | SHANK2   | 2.13E-08 | 2.36E-06    | 0.397403786  | MAVS->IRF3->CREBBP->CREB1->AKT1->MTOR->FKBP1A->RYR1->HOMER1->SHANK2                                | 25  | 0.00065  |
| CASP1    | ASS1     | 3.31E-08 | 3.38E-06    | 0.392393444  | CASP1->IL18->IFNG->IL2->STAT3->RAC1->AKT1->NOS3->ARG2->OTC->ASS1                                   | 24  | 0.00065  |
| CD79A    | HLA-DRA  | 1.17E-08 | 1.42E-06    | 0.404109604  | CD79A->SYK->VAV1->RAC1->AKT1->CREB1->CIITA->HLA-DRA                                                | 26  | 7.00E-04 |
| APOBEC1  | TFCP2    | 8.41E-09 | 1.08E-06    | 0.407701882  | APOBEC1->APOB->LDLR->APOE->APP->PSEN1->CTNNB1->GSK3B->TP53->YY1->TFCP2                             | 28  | 7.00E-04 |
| PSMB9    | CD69     | 6.75E-08 | 6.12E-06    | 0.384113473  | PSMB9->PSMB7->UCHL5->PSMD4->UBC->EGFR->STAT3->IL2->CD69                                            | 24  | 7.00E-04 |
| RNF43    | ABCB1    | 4.44E-16 | 8.68E-13    | 0.552683482  | RNF43->AKAP8L->DHX9->SF3A2->YBX1->TP53->ABCB1                                                      | 150 | 7.00E-04 |
| CEACAM1  | CYP2J2   | 3.70E-11 | 1.15E-08    | 0.461755841  | CEACAM1->PTPN11->EGFR->UBC->TP53->KAT5->PLA2G4A->CYP2J2                                            | 75  | 0.00075  |
| CCL7     | FCGR3B   | 1.93E-10 | 4.56E-08    | 0.446269883  | CCL7->CCR5->CD4->LCK->SYK->FCER1G->FCGR3B                                                          | 55  | 0.00075  |
| GAS1     | HMOX1    | 4.55E-07 | 2.97E-05    | 0.360744181  | GAS1->SHH->FGF8->FGFR1->PLCG1->EGFR->UBC->HIF1A->HMOX1                                             | 19  | 0.00075  |
| GAS1     | KANK4    | 3.07E-12 | 1.37E-09    | 0.483685968  | GAS1->SHH->FGF8->FGFR1->PLCG1->EGFR->UBC->TP53->TBP->POLR2A->POLR2H->POLR3D->POLR3F->POLR3C->KANK4 | 136 | 0.00075  |
| MAVS     | CRLS1    | 2.09E-13 | 1.41E-10    | 0.505753936  | MAVS->IRF3->CREBBP->TP53->BCL2->BNIP2->CDC42->PLD1->CDS2->CRLS1                                    | 156 | 0.00075  |
| SATB2    | ENPP3    | 9.77E-15 | 1.13E-11    | 0.529167499  | SATB2->HOXA2->CD1D->B2M->CD8A->IL2->IL5->IL3->ENPP3                                                | 172 | 0.00075  |
| SLC2A3   | FCGR3B   | 2.44E-15 | 4.02E-12    | 0.539204886  | SLC2A3->SP1->ESR1->SRC->CBL->SYK->FCER1G->FCGR3B                                                   | 238 | 8.00E-04 |
| SLC2A3   | FPR1     | 2.22E-16 | 4.96E-13    | 0.557121839  | SLC2A3->SP1->TP53->NPM1->NCL->S100A11->ANXA1->FPR1                                                 | 222 | 8.00E-04 |
| SLC2A3   | KLRD1    | 6.20E-14 | 5.10E-11    | 0.515223784  | SLC2A3->SP1->ESR1->SRC->CBL->SYK->TYROBP->KLRD1                                                    | 218 | 8.00E-04 |
| SLC2A3   | HLA-DRA  | 2.89E-15 | 4.51E-12    | 0.537670168  | SLC2A3->SP1->EP300->CREB1->CIITA->HLA-DRA                                                          | 205 | 8.00E-04 |
| SLC11A1  | FCGR3B   | 8.34E-11 | 2.31E-08    | 0.454237845  | SLC11A1->ZBTB17->MYC->EP300->STAT3->EGFR->CBL->SYK->FCER1G->FCGR3B                                 | 62  | 8.00E-04 |
| RNF43    | SCML1    | 6.06E-14 | 5.10E-11    | 0.515391773  | RNF43->AKAP8L->DHX9->SF3A2->YBX1->TP53->HDAC1->SIN3A->MECP2->CDKL5->NHS->SCML1                     | 234 | 8.00E-04 |
| NOP10    | TFCP2    | 1.50E-05 | 0.000495833 | -0.312373076 | NOP10->DKC1->RUVBL1->KAT5->TP53->YY1->TFCP2                                                        | 16  | 0.00085  |
| IGHD     | PIK3CG   | 3.56E-10 | 7.68E-08    | 0.440345527  | IGHD->GHRH->POMC->NR4A1->AKT1->PIK3CG                                                              | 49  | 0.00085  |
| CEACAM1  | CLEC4E   | 5.95E-14 | 5.10E-11    | -0.515541273 | CEACAM1->PTPN11->EGFR->UBC->IKBK->BCL10->CARD9->CLEC4E                                             | 275 | 9.00E-04 |
| SLC11A1  | PIK3AP1  | 1.82E-10 | 4.37E-08    | 0.446858197  | SLC11A1->ZBTB17->MYC->MAPK1->GRB2->PIK3R1->PIK3AP1                                                 | 66  | 9.00E-04 |
| CHST2    | CD69     | 1.33E-15 | 2.45E-12    | 0.543287197  | CHST2->SELL->CD34->MYB->CREBBP->TP53->EP300->STAT3->IL2->CD69                                      | 272 | 9.00E-04 |
| CHST2    | HLA-DRA  | 7.99E-15 | 9.62E-12    | 0.530515724  | CHST2->SELL->CD34->MYB->CREBBP->CREB1->CIITA->HLA-DRA                                              | 271 | 9.00E-04 |
| NOP10    | A1CF     | 1.22E-08 | 1.47E-06    | -0.403588966 | NOP10->DKC1->RUVBL1->CTNNB1->PSEN1->APP->APOE->LDLR->APOB->APOBEC1->A1CF                           | 40  | 9.00E-04 |
| NOP10    | TNFRSF18 | 2.68E-06 | 0.000123487 | 0.337245108  | NOP10->DKC1->TERT->AKT1->RAC1->STAT3->IL2->TNFRSF18                                                | 18  | 9.00E-04 |
| NOP10    | KLRD1    | 1.26E-08 | 1.50E-06    | 0.40328604   | NOP10->DKC1->TERT->AKT1->RAC1->VAV1->SYK->TYROBP->KLRD1                                            | 39  | 9.00E-04 |
| IGHD     | HLA-DRA  | 1.94E-10 | 4.56E-08    | 0.446233583  | IGHD->GHRH->GCG->LEP->STAT3->EP300->CREB1->CIITA->HLA-DRA                                          | 61  | 9.00E-04 |

|          |         |          |             |              |                                                                                                                      |     |         |
|----------|---------|----------|-------------|--------------|----------------------------------------------------------------------------------------------------------------------|-----|---------|
| CCL7     | CD69    | 1.08E-06 | 5.95E-05    | 0.349554402  | CCL7->CCR5->CD4->CD8A->IL2->CD69                                                                                     | 22  | 0.00095 |
| ANGPTL4  | HMOX1   | 1.00E-09 | 1.82E-07    | 0.430022593  | ANGPTL4->LPL->APOE->APP->PSEN1->CTNNB1->GSK3B->TP53->HIF1A->HMOX1                                                    | 49  | 0.00095 |
| PRF1     | CD69    | 1.38E-06 | 7.27E-05    | 0.346294404  | PRF1->CD8A->IL2->CD69                                                                                                | 23  | 0.00095 |
| PRF1     | SLA     | 1.76E-11 | 6.05E-09    | 0.468446673  | PRF1->CD8A->IL2->STAT3->EP300->MYOD1->TCF3->TAL1->LMO2->LDB1->LHX3->IFT172->SLA                                      | 127 | 0.00095 |
| NOP10    | UPP1    | 5.71E-10 | 1.14E-07    | 0.435678467  | NOP10->DKC1->RUVBL1->KAT5->TP53->RRM2B->RRM1->RRM2->TYMS->TK1->CDA->TYMP->UPP1                                       | 51  | 0.00095 |
| GAS1     | CCL18   | 1.07E-10 | 2.83E-08    | 0.451902229  | GAS1->SHH->FGF8->FGFR1->FRS2->GRB2->LCP2->LCK->CD4->CCR5->CCL13->CCR3->CCL18                                         | 81  | 0.001   |
| GAS1     | SLA     | 3.48E-11 | 1.09E-08    | 0.462315159  | GAS1->SHH->GLI2->IFT172->SLA                                                                                         | 129 | 0.001   |
| SERPINB2 | A1CF    | 4.39E-09 | 6.45E-07    | -0.414694299 | SERPINB2->PLAU->NFKB1->NFKBIA->BTRC->CTNNB1->PSEN1->APP->APOE->LDLR->APOB->APOBEC1->A1CF                             | 42  | 0.001   |
| PARVA    | LPHN2   | 1.22E-10 | 3.20E-08    | 0.450682714  | PARVA->ILK->AKT1->MTOR->FKBP1A->RYR1->HOMER1->SHANK2->LPHN2                                                          | 76  | 0.001   |
| MAVS     | A1CF    | 1.17E-08 | 1.42E-06    | 0.404054378  | MAVS->IRF3->CREBBP->CTNNB1->PSEN1->APP->APOE->LDLR->APOB->APOBEC1->A1CF                                              | 41  | 0.001   |
| SATB2    | CD55    | 3.90E-11 | 1.20E-08    | -0.461266693 | SATB2->HOXA2->CD1D->B2M->CD8A->LCK->SYK->CD19->CR2->C3->CD55                                                         | 120 | 0.001   |
| SLC2A3   | CCL18   | 5.29E-13 | 3.18E-10    | 0.498301001  | SLC2A3->SP1->EP300->RELA->NFKB1->CCL5->CCR3->CCL18                                                                   | 256 | 0.00105 |
| CEACAM1  | HMOX1   | 3.52E-06 | 0.000153605 | -0.333450511 | CEACAM1->PTPN11->EGFR->UBC->HIF1A->HMOX1                                                                             | 19  | 0.00105 |
| SLC22A18 | GNA11   | 1.86E-10 | 4.45E-08    | 0.446614204  | SLC22A18->CDKN1C->MYOD1->EP300->JUN->EDN1->EDNRB->GNA11                                                              | 81  | 0.00105 |
| CRB3     | MARCKS  | 5.51E-07 | 3.46E-05    | -0.358311949 | CRB3->PARD6A->CDC42->PLD1->PRKCA->MARCKS                                                                             | 26  | 0.00105 |
| PSMB9    | KLRD1   | 7.99E-08 | 6.96E-06    | 0.382130458  | PSMB9->PSMB7->UCHL5->PSMD4->UBC->EGFR->CBL->SYK->TYROBP->KLRD1                                                       | 36  | 0.00105 |
| RNF43    | CXCL13  | 4.84E-11 | 1.46E-08    | -0.459284305 | RNF43->AKAP8L->DHX9->SF3A2->CD2BP2->CD2->LCK->CD4->CXCR4->CXCL13                                                     | 119 | 0.00105 |
| CASP1    | ZFH3    | 2.27E-09 | 3.63E-07    | -0.421664979 | CASP1->IL18->IL1B->IL8->RELA->CREBBP->MYB->ZFH3                                                                      | 48  | 0.00105 |
| SLC2A3   | APBB1IP | 3.31E-12 | 1.46E-09    | 0.48305194   | SLC2A3->SP1->ESR1->SRC->PTK2->TLN1->APBB1IP                                                                          | 234 | 0.0011  |
| PGRMC1   | SCML1   | 2.83E-12 | 1.28E-09    | 0.484389946  | PGRMC1->M6PR->IGF1->IGF1R->ESR1->SP1->HDAC1->SIN3A->MECP2->CDKL5->NHS->SCML1                                         | 208 | 0.0011  |
| PIGR     | CXCL13  | 4.18E-06 | 0.000176829 | 0.331031366  | PIGR->CD79A->SYK->LCK->CD4->CXCR4->CXCL13                                                                            | 20  | 0.0011  |
| SATB2    | MID1    | 6.95E-12 | 2.72E-09    | 0.476658864  | SATB2->HOXA2->CD1D->B2M->CD8A->IL2->STAT3->EP300->SP1->SMAD3->RUNX2->SP7->MID1                                       | 146 | 0.0011  |
| CCL7     | CCL18   | 1.11E-09 | 1.96E-07    | 0.429045553  | CCL7->CCR3->CCL18                                                                                                    | 67  | 0.00115 |
| EBI3     | SNAPIN  | 4.17E-07 | 2.75E-05    | 0.361854206  | EBI3->IL27RA->STAT1->JAK2->GRB2->PDGFRB->SLC9A3R1->CFTR->STX1A->SNAP25->SNAPIN                                       | 29  | 0.00115 |
| ANGPTL4  | FPR1    | 2.80E-10 | 6.22E-08    | 0.442678475  | ANGPTL4->LPL->APOE->APP->PSEN1->CTNNB1->GSK3B->TP53->NPM1->NCL->S100A11->ANXA1->FPR1                                 | 80  | 0.00115 |
| CHRNA3   | MARCKS  | 2.56E-08 | 2.72E-06    | 0.395326163  | CHRNA3->PSMA4->UCHL5->PSMD4->UBC->EGFR->CBL->ARHGEF7->CDC42->PLD1->PRKCA->MARCKS                                     | 46  | 0.00115 |
| PRF1     | PIK3AP1 | 9.26E-10 | 1.69E-07    | 0.430843795  | PRF1->CD8A->LCK->LCP2->GRB2->PIK3R1->PIK3AP1                                                                         | 63  | 0.00115 |
| NOP10    | RBM39   | 2.11E-08 | 2.34E-06    | -0.397538201 | NOP10->DKC1->RUVBL1->KAT5->TP53->YBX1->SF3A2->RBM39                                                                  | 47  | 0.00115 |
| PTGER3   | FZD8    | 2.93E-09 | 4.52E-07    | 0.418971416  | PTGER3->KNG1->EGF->ERBB2->CTNNB1->AXIN1->LRP6->FZD8                                                                  | 58  | 0.00115 |
| RNF43    | A1CF    | 1.01E-11 | 3.75E-09    | 0.47342889   | RNF43->AKAP8L->DHX9->SF3A2->CD2BP2->CD2->LCK->LCP2->GRB2->ERBB2->CTNNB1->PSEN1->APP->APOE->LDLR->APOB->APOBEC1->A1CF | 144 | 0.00115 |
| MAVS     | GNA11   | 4.24E-07 | 2.78E-05    | 0.361661435  | MAVS->IRF3->CREBBP->CREB1->FOS->EDN1->EDNRB->GNA11                                                                   | 29  | 0.00115 |
| IGJ      | CD2     | 1.35E-09 | 2.32E-07    | 0.427009846  | IGJ->IL2->LCK->CD2                                                                                                   | 61  | 0.00115 |
| PTGER3   | LPHN2   | 6.98E-11 | 2.00E-08    | 0.45589728   | PTGER3->KNG1->KLB1->A2M->TGFB1->TGFB1R1->FKBP1A->RYR1->HOMER1->SHANK2->LPHN2                                         | 128 | 0.0012  |
| SYK      | ESRRG   | 8.08E-07 | 4.72E-05    | 0.353344265  | SYK->CBL->EGFR->UBC->TP53->SIRT1->PPARGCIA->ESRRG                                                                    | 29  | 0.0012  |
| MAP7D1   | SLA     | 5.59E-12 | 2.27E-09    | 0.478558607  | MAP7D1->ARTN->GFRA1->RET->SHC1->IGF1R->ESR1-                                                                         | 229 | 0.00125 |

|         |          |          |             |              |                                                                                                              |     |         |
|---------|----------|----------|-------------|--------------|--------------------------------------------------------------------------------------------------------------|-----|---------|
|         |          |          |             |              | >BRCA1->RBBP8->LMO4->LDB1->LHX3->IFT172->SLA                                                                 |     |         |
| ANGPTL4 | SNAPIN   | 2.13E-09 | 3.43E-07    | 0.422310071  | ANGPTL4->LPL->APOE->APP->PSEN1->CTNNB1->ERBB2->GRB2->PDGFRB->SLC9A3R1->CFTR->STX1A->SNAP25->SNAPIN           | 66  | 0.0013  |
| SAV1    | A1CF     | 2.07E-10 | 4.79E-08    | -0.445614751 | SAV1->RASSF1->HRAS->SOS1->GRB2->ERBB2->CTNNB1->PSEN1->APP->APOE->LDLR->APOB->APOBEC1->A1CF                   | 95  | 0.0013  |
| NOP10   | CXCL13   | 4.41E-06 | 0.000185849 | 0.330264623  | NOP10->DKC1->TERT->AKT1->RAC1->VAV1->LCP2->LCK->CD4->CXCR4->CXCL13                                           | 23  | 0.0013  |
| ATP2B4  | HRAS     | 4.63E-06 | 0.000192648 | -0.329565653 | ATP2B4->CALM1->IQGAP1->RAC1->AKT1->PIK3CA->HRAS                                                              | 23  | 0.0013  |
| ATP2B4  | SMAD7    | 5.69E-06 | 0.000227805 | 0.326633752  | ATP2B4->CALM1->CAMK2B->CREB1->EP300->SMAD2->TGFBF1->SMAD7                                                    | 23  | 0.0013  |
| RNF43   | UPP1     | 3.13E-11 | 1.01E-08    | -0.463292255 | RNF43->AKAP8L->DHX9->SF3A2->YBX1->TP53->RRM2B->RRM1->RRM2->TYMS->TK1->CDA->TYMP->UPP1                        | 152 | 0.0013  |
| RB1CC1  | RBM39    | 2.37E-09 | 3.76E-07    | 0.421196345  | RB1CC1->PTK2->GRB2->LCP2->LCK->CD2->CD2BP2->SF3A2->RBM39                                                     | 65  | 0.00135 |
| GAS1    | CD69     | 1.45E-06 | 7.59E-05    | 0.345563219  | GAS1->SHH->FGF8->FGFR1->PLCG1->EGFR->STAT3->IL2->CD69                                                        | 31  | 0.00135 |
| NOP10   | SHANK2   | 4.69E-06 | 0.000194667 | -0.329379909 | NOP10->DKC1->TERT->AKT1->MTOR->FKBP1A->RYR1->HOMER1->SHANK2                                                  | 24  | 0.00135 |
| CEACAM1 | FCGR3B   | 5.48E-09 | 7.59E-07    | -0.412330378 | CEACAM1->PTPN11->GRB2->BLNK->SYK->FCER1G->FCGR3B                                                             | 63  | 0.0014  |
| SLC11A1 | FPR1     | 7.79E-08 | 6.82E-06    | 0.382421258  | SLC11A1->ZBTB17->MYC->EP300->TP53->NPM1->NCL->S100A11->ANXA1->FPR1                                           | 47  | 0.0014  |
| SAV1    | JAK2     | 4.78E-09 | 6.86E-07    | 0.413792328  | SAV1->RASSF1->HRAS->SOS1->PTPN11->JAK2                                                                       | 61  | 0.0014  |
| PSMB9   | ZFH3     | 7.79E-08 | 6.82E-06    | -0.382427639 | PSMB9->PSMB7->UCHL5->PSMD4->UBC->TP53->CREBBP->MYB->ZFH3                                                     | 47  | 0.0014  |
| MAVS    | FCGR3B   | 8.55E-09 | 1.10E-06    | -0.407523127 | MAVS->IRF3->CREBBP->HIF1A->UBC->EGFR->CBL->SYK->FCER1G->FCGR3B                                               | 59  | 0.0014  |
| MAVS    | FPR1     | 1.42E-07 | 1.11E-05    | -0.37523462  | MAVS->IRF3->CREBBP->TP53->NPM1->NCL->S100A11->ANXA1->FPR1                                                    | 43  | 0.0014  |
| PTGER1  | CRIM1    | 5.45E-11 | 1.61E-08    | -0.458196402 | PTGER1->BDKRB2->KNG1->EGF->SRC->ESR1->EP300->SMAD2->SMAD4->SMAD1->BMPR1A->BMP4->CRIM1                        | 163 | 0.00145 |
| PRF1    | CCL18    | 2.68E-09 | 4.20E-07    | 0.419904779  | PRF1->CD8A->CD4->CCR5->CCL5->CCR3->CCL18                                                                     | 73  | 0.00145 |
| CXCL14  | DYNC1I2  | 1.33E-11 | 4.67E-09    | 0.470969799  | CXCL14->CXCR4->CD4->IFNG->IL2->STAT3->EP300->TP53->CHEK1->CLSPN->PLK1->NUDC->PAFAH1B1->DCTN1->DCTN2->DYNC1I2 | 210 | 0.00145 |
| SYK     | A1CF     | 8.91E-07 | 5.11E-05    | 0.352061463  | SYK->CBL->GRB2->ERBB2->CTNNB1->PSEN1->APP->APOE->LDLR->APOB->APOBEC1->A1CF                                   | 37  | 0.00145 |
| RNF43   | PIK3AP1  | 5.03E-11 | 1.50E-08    | -0.458935032 | RNF43->AKAP8L->DHX9->SF3A2->CD2BP2->CD2->LCK->LCP2->GRB2->PIK3R1->PIK3AP1                                    | 164 | 0.00145 |
| SATB2   | A1CF     | 1.67E-10 | 4.12E-08    | 0.447647641  | SATB2->HOXA2->CD1D->B2M->CD8A->IL2->STAT3->SRC->CTNNB1->PSEN1->APP->APOE->LDLR->APOB->APOBEC1->A1CF          | 110 | 0.00145 |
| CEACAM1 | KLRD1    | 2.79E-07 | 1.98E-05    | -0.36693184  | CEACAM1->PTPN11->GRB2->BLNK->SYK->TYROBP->KLRD1                                                              | 43  | 0.0015  |
| EBI3    | RASGRP2  | 7.66E-09 | 1.01E-06    | 0.408712815  | EBI3->IL27RA->STAT1->EP300->HIF1A->HSP90AA1->RAF1->KRAS->RASGRP2                                             | 68  | 0.0015  |
| ANGPTL4 | FCGR3B   | 6.29E-10 | 1.21E-07    | 0.434716752  | ANGPTL4->LPL->APOE->APP->PSEN1->CTNNB1->ERBB2->GRB2->VAV1->SYK->FCER1G->FCGR3B                               | 94  | 0.0015  |
| NOP10   | CD69     | 3.43E-06 | 0.000151157 | 0.333793133  | NOP10->DKC1->TERT->AKT1->RAC1->STAT3->IL2->CD69                                                              | 28  | 0.0015  |
| RFXAP   | TAX1BP3  | 1.63E-07 | 1.23E-05    | -0.373578738 | RFXAP->RFXANK->CIITA->CREB1->AKT1->RAC1->ARHGDI1A->RHOA->RTKN->TAX1BP3                                       | 44  | 0.0015  |
| GAS1    | SHANK2   | 2.64E-06 | 0.00012232  | -0.337455104 | GAS1->SHH->BMP4->BMPR1A->SMAD1->SMAD4->TGFBF1->FKBP1A->RYR1->HOMER1->SHANK2                                  | 30  | 0.00155 |
| PRF1    | SHANK2   | 8.46E-06 | 0.000310627 | -0.320876781 | PRF1->CD8A->IL2->STAT3->EP300->SMAD2->TGFBF1->FKBP1A->RYR1->HOMER1->SHANK2                                   | 26  | 0.00155 |
| SLC2A3  | NAMPT    | 3.28E-11 | 1.05E-08    | 0.462864705  | SLC2A3->SP1->EP300->STAT3->IL6->NAMPT                                                                        | 223 | 0.0016  |
| SLC11A1 | ARHGEF19 | 8.34E-07 | 4.84E-05    | -0.352930061 | SLC11A1->ZBTB17->MYC->CTNNB1->DVL1->DAAM1->ARHGEF19                                                          | 41  | 0.0016  |
| ANGPTL4 | A1CF     | 2.19E-08 | 2.40E-06    | -0.397076744 | ANGPTL4->LPL->APOB->APOBEC1->A1CF                                                                            | 65  | 0.0016  |



|          |          |          |             |              |                                                                                                                       |     |         |
|----------|----------|----------|-------------|--------------|-----------------------------------------------------------------------------------------------------------------------|-----|---------|
| CHST2    | HMOX1    | 2.05E-11 | 6.88E-09    | 0.467114629  | CHST2->SELL->CD34->MYB->CREBBP->HIF1A->HMOX1                                                                          | 257 | 0.0016  |
| FCRL5    | CD2      | 7.81E-10 | 1.47E-07    | 0.432559934  | FCRL5->BCL9->CTNNB1->ERBB2->GRB2->LCP2->LCK->CD2                                                                      | 90  | 0.0016  |
| CASP1    | NAMPT    | 5.44E-07 | 3.42E-05    | 0.358474195  | CASP1->IL18->IL1B->IL6->NAMPT                                                                                         | 42  | 0.0016  |
| CEACAM1  | PTPRH    | 4.12E-08 | 4.08E-06    | 0.389871708  | CEACAM1->PTPN11->MAPK3->ELK1->SRF->PTPRH                                                                              | 64  | 0.00165 |
| CD79A    | SNAPIN   | 1.26E-05 | 0.000426426 | 0.315016403  | CD79A->BLNK->GRB2->PDGFRB->SLC9A3R1->CFTR->STX1A->SNAP25->SNAPIN                                                      | 26  | 0.00165 |
| LEPRE1   | LPHN2    | 1.30E-09 | 2.24E-07    | 0.427430999  | LEPRE1->PPIB->BSG->MMP1->TIMP1->TGFB1->TGFB1->FKBP1A->RYR1->HOMER1->SHANK2->LPHN2                                     | 96  | 0.00165 |
| GAS1     | TAX1BP3  | 7.21E-07 | 4.30E-05    | 0.354818627  | GAS1->SHH->FGF8->FGFR1->FRS2->GRB2->VAV1->RAC1->ARHGDI1->RHOA->RTKN->TAX1BP3                                          | 43  | 0.00165 |
| FCRL5    | CD69     | 5.88E-10 | 1.16E-07    | 0.435388774  | FCRL5->BCL9->CTNNB1->CCND1->STAT3->IL2->CD69                                                                          | 105 | 0.00165 |
| IGKC     | ZAP70    | 7.56E-06 | 0.000285698 | 0.322517626  | IGKC->ERBB4->EGF->EGFR->SHC1->ZAP70                                                                                   | 30  | 0.00165 |
| RNF43    | VNN2     | 2.30E-11 | 7.57E-09    | -0.466073286 | RNF43->AKAP8L->DHX9->SF3A2->CD2BP2->CD2->LCK->NFKB1A->NFKB1->ICAM1->ITGB2->VNN2                                       | 271 | 0.00165 |
| CEACAM1  | SHANK2   | 4.58E-06 | 0.000190817 | 0.329720073  | CEACAM1->PTPN11->JAK2->STAT3->EP300->SMAD2->TGFB1->FKBP1A->RYR1->HOMER1->SHANK2                                       | 32  | 0.0017  |
| EBI3     | KCNQ2    | 1.57E-06 | 8.07E-05    | 0.344487725  | EBI3->IL27RA->STAT1->EP300->CREB1->CAMK2B->CALM1->KCNQ2                                                               | 40  | 0.0017  |
| RNF43    | JAK2     | 5.14E-10 | 1.05E-07    | -0.436723353 | RNF43->AKAP8L->DHX9->SF3A2->CD2BP2->CD2->LCK->PTPN6->JAK2                                                             | 110 | 0.0017  |
| CCL7     | HLA-DRA  | 1.15E-05 | 0.000395266 | 0.316383976  | CCL7->CCR5->CD4->IFNG->IFNGR1->STAT1->EP300->CREB1->CIITA->HLA-DRA                                                    | 27  | 0.00175 |
| CEACAM1  | CCL18    | 3.78E-09 | 5.73E-07    | -0.416306236 | CEACAM1->PTPN11->GRB2->LCP2->LCK->CD4->CCR5->CCL13->CCR3->CCL18                                                       | 82  | 0.0018  |
| CD79A    | SLA      | 6.60E-10 | 1.26E-07    | 0.434235739  | CD79A->BLNK->GRB2->ERBB2->CTNNB1->TCF4->TAL1->LMO2->LDB1->LHX3->IFT172->SLA                                           | 124 | 0.0018  |
| SERPINB2 | ABCB1    | 2.09E-07 | 1.53E-05    | -0.370475021 | SERPINB2->PLAU->JUN->MAPK8->TP53->ABCB1                                                                               | 48  | 0.0018  |
| IGHD     | KLRD1    | 2.94E-08 | 3.06E-06    | 0.393740885  | IGHD->GHRH->GCG->LEP->STAT3->EGFR->CBL->SYK->TYROBP->KLRD1                                                            | 72  | 0.0018  |
| GAS1     | HLA-DRA  | 6.78E-06 | 0.000261642 | 0.324095318  | GAS1->SHH->FGF8->FGFR1->FRS2->PTPN11->STAT1->EP300->CREB1->CIITA->HLA-DRA                                             | 34  | 0.00185 |
| SERPINB2 | RBM39    | 2.78E-07 | 1.98E-05    | -0.366963937 | SERPINB2->PLAU->JUN->MAPK8->TP53->YBX1->SF3A2->RBM39                                                                  | 46  | 0.00185 |
| NFIB     | CRIM1    | 1.56E-10 | 3.88E-08    | 0.448308638  | NFIB->HNF1A->HNF4A->SMAD4->SMAD1->BMP1A->BMP4->CRIM1                                                                  | 146 | 0.00185 |
| IGHD     | ZAP70    | 1.23E-06 | 6.63E-05    | 0.347791003  | IGHD->GHRH->GCG->LEP->STAT3->JAK2->SHC1->ZAP70                                                                        | 43  | 0.00185 |
| RB1CC1   | SLC25A11 | 5.46E-10 | 1.09E-07    | -0.436130536 | RB1CC1->PTK2->PTEN->TP53->BCL2->BNIP3->BCKDHB->DLD->OGDH->SLC25A11                                                    | 134 | 0.0019  |
| SAV1     | CD55     | 1.42E-09 | 2.43E-07    | 0.426475735  | SAV1->RASSF1->HRAS->SOS1->GRB2->VAV1->CD19->CR2->C3->CD55                                                             | 106 | 0.00195 |
| PTGER1   | ARHGEF19 | 3.82E-09 | 5.78E-07    | -0.416171277 | PTGER1->BDKRB2->KNG1->EGF->ERBB2->CTNNB1->DVL1->DAAM1->ARHGEF19                                                       | 95  | 0.002   |
| MAP7D1   | ST3GAL1  | 7.25E-11 | 2.06E-08    | 0.455550461  | MAP7D1->ARTN->GFRA1->RET->GRB2->LCP2->LCK->CD2->CD2BP2->SF3A2->SNRPE->LSM4->EXOSC10->CHPF->B4GALNT1->ST8SIA1->ST3GAL1 | 250 | 0.002   |
| IGKC     | PIK3CG   | 9.12E-06 | 0.000327379 | 0.319785463  | IGKC->ERBB4->EGF->EGFR->SOS1->HRAS->PIK3CG                                                                            | 37  | 0.00215 |
| CCL7     | ARHGEF19 | 8.79E-06 | 0.000319499 | -0.320318201 | CCL7->CCR5->CD4->LCK->LCP2->GRB2->ERBB2->CTNNB1->DVL1->DAAM1->ARHGEF19                                                | 39  | 0.0022  |
| CCL7     | A1CF     | 7.26E-06 | 0.000276534 | -0.32311507  | CCL7->CCR5->CD4->LCK->LCP2->GRB2->ERBB2->CTNNB1->PSEN1->APP->APOE->LDLR->APOB->APOBEC1->A1CF                          | 41  | 0.0022  |
| NOP10    | ABCB1    | 6.02E-07 | 3.70E-05    | -0.357159241 | NOP10->DKC1->RUVBL1->KAT5->TP53->ABCB1                                                                                | 49  | 0.0022  |
| MAP7D1   | LPHN2    | 1.05E-10 | 2.81E-08    | 0.452064977  | MAP7D1->ARTN->GFRA1->RET->GRB2->VAV1->RAC1->AKT1->MTOR->FKBP1A->RYR1->HOMER1->SHANK2->LPHN2                           | 184 | 0.0022  |
| SATB2    | CTSA     | 4.22E-09 | 6.22E-07    | 0.415136146  | SATB2->HOXA2->CD1D->CTSA                                                                                              | 104 | 0.0022  |
| SATB2    | ABCB1    | 1.85E-09 | 3.06E-07    | 0.423765915  | SATB2->HOXA2->CD1D->B2M->CD8A->IL2->STAT3->EP300->TP53->ABCB1                                                         | 117 | 0.0022  |
| LEPRE1   | PKP2     | 2.52E-06 | 0.00011848  | -0.338104154 | LEPRE1->PPIB->BSG->MMP1->JUN->MAPK8->TP53-                                                                            | 44  | 0.00225 |

|          |          |          |             |              |                                                                                                                         |     |         |
|----------|----------|----------|-------------|--------------|-------------------------------------------------------------------------------------------------------------------------|-----|---------|
|          |          |          |             |              | >GSK3B->CTNNB1->CDH2->JUP->DSP->PKP2                                                                                    |     |         |
| SAV1     | ENPP3    | 2.89E-10 | 6.38E-08    | -0.442365609 | SAV1->RASSF1->HRAS->SOS1->PTPN11->JAK2->CSF2RB->IL3->ENPP3                                                              | 160 | 0.00225 |
| RNF43    | NT5E     | 5.38E-10 | 1.09E-07    | -0.43627473  | RNF43->AKAP8L->DHX9->SF3A2->YBX1->TP53->USP7->GMPS->IMPDH2->NT5E                                                        | 154 | 0.00225 |
| SLC11A1  | KLRD1    | 6.82E-06 | 0.000262725 | 0.3240177    | SLC11A1->ZBTB17->MYC->EP300->STAT3->EGFR->CBL->SYK->TYROBP->KLRD1                                                       | 42  | 0.0023  |
| PRF1     | CLEC4E   | 8.79E-11 | 2.39E-08    | 0.45374436   | PRF1->CD8A->LCK->NFKBIA->IKBK->BCL10->CARD9->CLEC4E                                                                     | 269 | 0.0023  |
| IGHD     | THEMIS   | 1.05E-10 | 2.81E-08    | 0.452093266  | IGHD->GHRH->GCG->LEP->STAT3->IL2->THEMIS                                                                                | 225 | 0.0023  |
| PRKAA2   | MYEF2    | 1.50E-06 | 7.76E-05    | 0.34516758   | PRKAA2->MTOR->AKT1->MDM2->RB1->RBBP4->SIN3A->HDAC9->MYEF2                                                               | 46  | 0.0023  |
| PSMB9    | THEMIS   | 1.75E-10 | 4.26E-08    | 0.447195217  | PSMB9->PSMB7->UCHL5->PSMD4->UBC->EGFR->STAT3->IL2->THEMIS                                                               | 191 | 0.00235 |
| CASP1    | THEMIS   | 1.54E-10 | 3.86E-08    | 0.448427637  | CASP1->IL18->IFNG->IL2->THEMIS                                                                                          | 188 | 0.00235 |
| IGJ      | PIK3CG   | 1.59E-07 | 1.21E-05    | 0.373867805  | IGJ->IL2->STAT3->RAC1->AKT1->PIK3CG                                                                                     | 67  | 0.00235 |
| SLC11A1  | ABCB1    | 8.83E-07 | 5.08E-05    | -0.352176089 | SLC11A1->ZBTB17->MYC->EP300->TP53->ABCB1                                                                                | 51  | 0.0024  |
| PSMB9    | KCNQ2    | 9.45E-06 | 0.000336822 | 0.319258234  | PSMB9->PSMB7->UCHL5->PSMD4->UBC->MDM2->AKT1->RAC1->IQGAP1->CALM1->KCNQ2                                                 | 41  | 0.0024  |
| PGRMC1   | BCL11A   | 9.48E-10 | 1.72E-07    | 0.430607002  | PGRMC1->M6PR->IGF1->IGF1R->ESR1->NCOA2->BCL11A                                                                          | 147 | 0.00245 |
| CRB3     | TFCP2    | 2.49E-05 | 0.000738693 | -0.304602375 | CRB3->PARD6A->CDC42->BNIP2->BCL2->TP53->YY1->TFCP2                                                                      | 33  | 0.00245 |
| MAP7D1   | HMOX1    | 5.14E-09 | 7.21E-07    | 0.413019615  | MAP7D1->ARTN->GFRA1->RET->SHC1->EGFR->UBC->HIF1A->HMOX1                                                                 | 116 | 0.00245 |
| SERPINB2 | CD55     | 9.15E-07 | 5.21E-05    | 0.351710447  | SERPINB2->PLAU->JUN->MAPK1->GRB2->VAV1->CD19->CR2->C3->CD55                                                             | 54  | 0.0025  |
| ANGPTL4  | UPP1     | 4.40E-08 | 4.34E-06    | 0.389126254  | ANGPTL4->LPL->APOE->APP->PSEN1->CTNNB1->GSK3B->TP53->RRM2B->RRM1->RRM2->TYMS->TK1->CDA->TYMP->UPP1                      | 86  | 0.0025  |
| MAP7D1   | FPR1     | 1.15E-09 | 2.02E-07    | 0.428654767  | MAP7D1->ARTN->GFRA1->RET->SHC1->EGFR->UBC->TP53->NPM1->NCL->S100A11->ANXA1->FPR1                                        | 148 | 0.0025  |
| IGKC     | TFCP2    | 1.39E-05 | 0.000465252 | -0.313508073 | IGKC->ERBB4->EGF->SRC->ESR1->EP300->YY1->TFCP2                                                                          | 37  | 0.0025  |
| CDON     | KCNQ2    | 1.46E-06 | 7.62E-05    | 0.345484108  | CDON->CDH2->CTNNB1->IQGAP1->CALM1->KCNQ2                                                                                | 49  | 0.0025  |
| CD79A    | LTF      | 1.02E-05 | 0.000358462 | 0.31814697   | CD79A->BLNK->GRB2->ERBB2->CTNNB1->PSEN1->APP->A2M->LYZ->LTF                                                             | 43  | 0.00255 |
| RNF43    | GALNT1   | 2.90E-09 | 4.49E-07    | -0.41909189  | RNF43->AKAP8L->DHX9->SF3A2->SNRPD3->LSM7->EXOSC6->CHPF->GALNT1                                                          | 138 | 0.00255 |
| CDON     | ARHGEF19 | 8.30E-06 | 0.000306123 | -0.321161988 | CDON->CDH2->CTNNB1->DVL1->DAAM1->ARHGEF19                                                                               | 44  | 0.00255 |
| COL4A5   | CGGBP1   | 6.29E-09 | 8.60E-07    | 0.410847353  | COL4A5->COL4A3->COL4A4->IGBP1->PPP2CA->SGOL1->PLK1->CDC25C->CHEK2->TP53->MDM2->AKT1->RAC1->NCKAP1->CYFIP1->FMR1->CGGBP1 | 123 | 0.0026  |
| PIGR     | SPINK5   | 2.69E-10 | 6.05E-08    | 0.443085473  | PIGR->CD79A->BLNK->GRB2->ERBB2->CTNNB1->CTNNA1->JUP->DSG1->KLK5->SPINK5                                                 | 187 | 0.0026  |
| PSMB9    | CCL18    | 1.50E-07 | 1.15E-05    | 0.37454081   | PSMB9->PSMB7->UCHL5->PSMD4->UBC->EGFR->GRB2->LCP2->LCK->CD4->CCR5->CCL13->CCR3->CCL18                                   | 76  | 0.0026  |
| IGKC     | CD177    | 2.50E-08 | 2.68E-06    | 0.395614534  | IGKC->ERBB4->EGF->SRC->ESR1->NCOA3->CREBBP->MYB->PRTN3->CD177                                                           | 101 | 0.0026  |
| RNF43    | RBM39    | 3.98E-09 | 5.96E-07    | 0.41573387   | RNF43->AKAP8L->DHX9->SF3A2->RBM39                                                                                       | 130 | 0.0026  |
| SLC11A1  | ESRRG    | 2.24E-05 | 0.000677176 | -0.306259285 | SLC11A1->ZBTB17->MYC->EP300->SIRT1->PPARGC1A->ESRRG                                                                     | 35  | 0.00265 |
| SLC11A1  | CCL18    | 1.36E-07 | 1.07E-05    | 0.375794268  | SLC11A1->ZBTB17->MYC->EP300->RELA->NFKB1->CCL5->CCR3->CCL18                                                             | 80  | 0.0027  |
| PQBP1    | SCML1    | 8.83E-10 | 1.65E-07    | 0.43132396   | PQBP1->TXNL4A->CD2BP2->CD2->LCK->NFKBIA->RELA->HDAC1->SIN3A->MECP2->CDKL5->NHS->SCML1                                   | 163 | 0.0027  |
| MAVS     | BCL11A   | 2.23E-07 | 1.62E-05    | 0.369694606  | MAVS->IRF3->CREBBP->NCOA3->AR->NCOA2->BCL11A                                                                            | 72  | 0.0027  |
| CCL7     | UPP1     | 1.88E-06 | 9.30E-05    | 0.342072139  | CCL7->CCR5->CD4->IFNG->IFNGR1->STAT1->EP300->TP53->RRM2B->RRM1->RRM2->TYMS->TK1->CDA->TYMP->UPP1                        | 51  | 0.00275 |

|          |          |          |             |              |                                                                                      |     |         |
|----------|----------|----------|-------------|--------------|--------------------------------------------------------------------------------------|-----|---------|
| CCL7     | PIK3AP1  | 5.54E-07 | 3.47E-05    | 0.35823459   | CCL7->CCR5->CD4->IFNG->CD80->CD28->PIK3R1->PIK3AP1                                   | 61  | 0.00275 |
| PIGR     | CYP2J2   | 2.93E-07 | 2.06E-05    | 0.366304832  | PIGR->CD79A->BLNK->GRB2->ERBB2->CTNNB1->RUVBL1->KAT5->PLA2G4A->CYP2J2                | 71  | 0.00275 |
| RNF43    | MID1     | 6.00E-10 | 1.18E-07    | 0.43518324   | RNF43->AKAP8L->DHX9->SF3A2->YBX1->TP53->SP1->SMAD3->RUNX2->SP7->MID1                 | 180 | 0.00275 |
| RNF43    | SLA      | 2.77E-10 | 6.19E-08    | -0.442797377 | RNF43->AKAP8L->DHX9->SF3A2->YBX1->TP53->BRCA1->RBBP8->LMO4->LDB1->LHX3->IFT172->SLA  | 228 | 0.00275 |
| IGJ      | HLA-DRA  | 1.68E-07 | 1.26E-05    | 0.37319543   | IGJ->IL2->STAT3->EP300->CREB1->CIITA->HLA-DRA                                        | 79  | 0.00275 |
| PRF1     | FPR1     | 7.83E-06 | 0.000290868 | 0.322012145  | PRF1->CD8A->IL2->STAT3->EP300->TP53->NPM1->NCL->S100A11->ANXA1->FPR1                 | 46  | 0.0028  |
| HLA-DQB2 | TNFRSF1B | 2.71E-08 | 2.85E-06    | 0.394700674  | HLA-DQB2->ZFYVE9->SMAD2->EP300->RELA->CHUK->TRAF2->TNFRSF1B                          | 107 | 0.0028  |
| IGJ      | ZAP70    | 7.88E-07 | 4.63E-05    | 0.353659269  | IGJ->IL2->LCK->ZAP70                                                                 | 61  | 0.0028  |
| PSMB9    | SLA      | 1.74E-08 | 1.99E-06    | 0.39965776   | PSMB9->PSMB7->UCHL5->PSMD4->UBC->TP53->BRCA1->RBBP8->LMO4->LDB1->LHX3->IFT172->SLA   | 124 | 0.00285 |
| SYK      | ABC1     | 8.79E-06 | 0.000319499 | 0.320312739  | SYK->CBL->EGFR->UBC->TP53->ABC1                                                      | 45  | 0.00285 |
| SLC2A3   | A1CF     | 6.63E-10 | 1.26E-07    | -0.434194713 | SLC2A3->SP1->MYC->CTNNB1->PSEN1->APP->APOE->LDLR->APOB->APOBEC1->A1CF                | 220 | 0.0029  |
| PTGER1   | MTMR3    | 5.36E-10 | 1.09E-07    | -0.436316723 | PTGER1->BDKRB2->KNG1->EGF->SRC->PTK2->PTEN->INPP4B->MTMR3                            | 205 | 0.0029  |
| SLC22A18 | CYP2J2   | 2.03E-08 | 2.27E-06    | 0.397960612  | SLC22A18->CDKN1C->CDK4->RB1->TP53->KAT5->PLA2G4A->CYP2J2                             | 118 | 0.0029  |
| SAV1     | BCL11A   | 1.55E-08 | 1.82E-06    | -0.400935861 | SAV1->RASSF1->HRAS->RAF1->HSP90AA1->ESR1->NCOA2->BCL11A                              | 127 | 0.0029  |
| PTGER1   | SOS2     | 8.16E-07 | 4.76E-05    | -0.353205254 | PTGER1->BDKRB2->KNG1->EGF->GRB2->SOS2                                                | 65  | 0.00295 |
| CHST2    | CD2      | 2.63E-10 | 5.97E-08    | 0.443282043  | CHST2->SELL->CD34->MYB->CREBBP->RELA->NFKBIA->LCK->CD2                               | 258 | 0.00295 |
| NOP10    | C18orf10 | 6.35E-09 | 8.63E-07    | 0.410752447  | NOP10->DKC1->RUVBL1->CTNNB1->BTRC->NFKBIA->NFKB1->C18orf10                           | 141 | 0.00295 |
| RNF43    | CD55     | 2.57E-09 | 4.04E-07    | -0.420360281 | RNF43->AKAP8L->DHX9->SF3A2->CD2BP2->CD2->LCK->SYK->CD19->CR2->C3->CD55               | 154 | 0.00295 |
| SERPIN2  | PIK3AP1  | 9.96E-07 | 5.60E-05    | 0.350590435  | SERPIN2->PLAU->JUN->MAPK8->IRS1->PIK3R1->PIK3AP1                                     | 62  | 0.003   |
| RNF43    | KLRD1    | 1.22E-08 | 1.47E-06    | -0.40361282  | RNF43->AKAP8L->DHX9->SF3A2->CD2BP2->CD2->LCK->SYK->TYROBP->KLRD1                     | 138 | 0.003   |
| SATB2    | PIK3AP1  | 1.65E-08 | 1.90E-06    | -0.400284705 | SATB2->HOXA2->CD1D->B2M->CD8A->LCK->LCP2->GRB2->PIK3R1->PIK3AP1                      | 130 | 0.003   |
| SERPIN2  | UPP1     | 5.59E-06 | 0.000224908 | 0.32687245   | SERPIN2->PLAU->JUN->MAPK8->TP53->RRM2B->RRM1->RRM2->TYMS->TK1->CDA->TYMP->UPP1       | 50  | 0.00305 |
| PRF1     | ZFH3     | 3.18E-06 | 0.000142113 | -0.334872349 | PRF1->GZMB->CASP3->BCL2->MYB->ZFH3                                                   | 51  | 0.00305 |
| SLC2A3   | HMOX1    | 9.07E-10 | 1.67E-07    | 0.431046743  | SLC2A3->SP1->HIF1A->HMOX1                                                            | 191 | 0.0031  |
| SATB2    | CRYZ     | 9.28E-09 | 1.18E-06    | -0.406633202 | SATB2->HOXA2->CD1D->B2M->CD8A->IL2->STAT3->RAC1->NCF2->DECR1->CRYZ                   | 142 | 0.0031  |
| CEACAM1  | ARHGEF19 | 1.31E-05 | 0.000440523 | 0.314456561  | CEACAM1->PTPN11->GRB2->ERBB2->CTNNB1->DVL1->DAAM1->ARHGEF19                          | 45  | 0.00315 |
| GAS1     | FPR1     | 4.54E-06 | 0.000190213 | 0.329840769  | GAS1->SHH->FGF8->FGFR1->PLCG1->EGFR->UBC->TP53->NPM1->NCL->S100A11->ANXA1->FPR1      | 51  | 0.00315 |
| PRF1     | THEMIS   | 1.10E-09 | 1.96E-07    | 0.429092498  | PRF1->CD8A->IL2->THEMIS                                                              | 190 | 0.00315 |
| NOP10    | BCL11A   | 6.51E-07 | 3.94E-05    | -0.356140856 | NOP10->DKC1->RUVBL1->CTNNB1->AR->NCOA2->BCL11A                                       | 73  | 0.00315 |
| PSMB9    | APBB1IP  | 3.49E-06 | 0.000152772 | 0.33354619   | PSMB9->PSMB7->UCHL5->PSMD4->UBC->EGFR->SRC->PTK2->TLN1->APBB1IP                      | 54  | 0.00315 |
| SYK      | ETV6     | 1.86E-05 | 0.000585892 | 0.309072401  | SYK->CBL->SHC1->JAK2->ETV6                                                           | 43  | 0.00315 |
| RNF43    | CD69     | 3.01E-08 | 3.10E-06    | -0.393472713 | RNF43->AKAP8L->DHX9->SF3A2->CD2BP2->CD2->LCK->IL2->CD69                              | 126 | 0.00315 |
| SLC11A1  | BCL11A   | 6.72E-07 | 4.03E-05    | -0.355745355 | SLC11A1->ZBTB17->MYC->ESR1->NCOA2->BCL11A                                            | 75  | 0.0032  |
| GAS1     | CYP2J2   | 6.39E-07 | 3.88E-05    | -0.356383733 | GAS1->SHH->FGF8->FGFR1->PLCG1->EGFR->UBC->TP53->KAT5->PLA2G4A->CYP2J2                | 75  | 0.0032  |
| IGHD     | SLA      | 4.56E-09 | 6.63E-07    | 0.414302207  | IGHD->GHRH->GCG->LEP->STAT3->EP300->MYOD1->TCF3->TAL1->LMO2->LDB1->LHX3->IFT172->SLA | 160 | 0.0032  |

|          |          |          |             |              |                                                                                                                            |     |         |
|----------|----------|----------|-------------|--------------|----------------------------------------------------------------------------------------------------------------------------|-----|---------|
| CEACAM1  | FPR1     | 7.88E-06 | 0.000292549 | -0.321910795 | CEACAM1->PTPN11->EGFR->UBC->TP53->NPM1->NCL->S100A11->ANXA1->FPR1                                                          | 51  | 0.00325 |
| GAS1     | HAS2     | 1.91E-08 | 2.17E-06    | 0.398608935  | GAS1->SHH->NOG->BMP2->HAS2                                                                                                 | 140 | 0.00325 |
| SERPINB2 | ARHGEF19 | 2.75E-05 | 0.000796636 | -0.30309113  | SERPINB2->PLAU->NFKB1->NFKBIA->BTRC->CTNNB1->DVL1->DAAM1->ARHGEF19                                                         | 40  | 0.00325 |
| SERPINB2 | NT5E     | 6.61E-06 | 0.00025608  | 0.324477614  | SERPINB2->PLAU->JUN->MAPK8->TP53->USP7->GMPS->IMPDH2->NT5E                                                                 | 52  | 0.00325 |
| MAP7D1   | CD69     | 3.52E-08 | 3.56E-06    | 0.391681182  | MAP7D1->ARTN->GFRA1->RET->SHC1->IL2->CD69                                                                                  | 128 | 0.00325 |
| MMP8     | CCL18    | 5.34E-09 | 7.43E-07    | 0.412604679  | MMP8->TIMP2->MMP2->JUN->IL2->CD8A->CD4->CCR5->CCL13->CCR3->CCL18                                                           | 166 | 0.0033  |
| ANGPTL4  | GNA11    | 1.53E-06 | 7.90E-05    | -0.344863457 | ANGPTL4->LPL->APOE->APP->PSEN1->CTNNB1->ERBB2->GRB2->RET->GDNF->EDNRB->GNA11                                               | 67  | 0.0033  |
| ANGPTL4  | SHANK2   | 2.31E-06 | 0.000109451 | -0.339297883 | ANGPTL4->LPL->APOE->APP->PSEN1->CTNNB1->CCND1->CDKN1B->AKT1->MTOR->FKBP1A->RYR1->HOMER1->SHANK2                            | 61  | 0.0033  |
| SALL2    | SMAD7    | 3.58E-05 | 0.000979496 | 0.298906045  | SALL2->NGFR->SHC1->ERBB2->CTNNB1->SMAD7                                                                                    | 39  | 0.0033  |
| GAS1     | GALNT1   | 5.58E-06 | 0.000224569 | 0.326912518  | GAS1->SHH->FGF8->FGFR1->FRS2->GRB2->LCP2->LCK->CD2->CD2BP2->SF3A2->SNRPE->LSM4->EXOSC10->CHPF->GALNT1                      | 58  | 0.00335 |
| GAS1     | SCML1    | 3.30E-08 | 3.38E-06    | -0.392415629 | GAS1->SHH->FGF8->FGFR1->PLCG1->EGFR->UBC->TP53->HDAC1->SIN3A->MECP2->CDKL5->NHS->SCML1                                     | 139 | 0.00335 |
| ANGPTL4  | FZD8     | 1.55E-05 | 0.000509266 | -0.311829266 | ANGPTL4->LPL->APOE->APP->PSEN1->CTNNB1->AXIN1->LRP6->FZD8                                                                  | 45  | 0.00335 |
| MAP7D1   | A1CF     | 2.19E-08 | 2.40E-06    | -0.397108707 | MAP7D1->ARTN->GFRA1->RET->GRB2->ERBB2->CTNNB1->PSEN1->APP->APOE->LDLR->APOB->APOBEC1->A1CF                                 | 143 | 0.00335 |
| CASP1    | IDH2     | 7.48E-06 | 0.00028325  | 0.322678021  | CASP1->IL18->IFNG->IL2->STAT3->SRC->CTNNB1->PITX2->SUCLG1->SDHB->FH->MDH2->CS->ACO2->IDH2                                  | 54  | 0.00335 |
| SALL2    | HMOX1    | 2.93E-05 | 0.000841524 | 0.302060706  | SALL2->NGFR->SHC1->EGFR->UBC->HIF1A->HMOX1                                                                                 | 41  | 0.0034  |
| SLC2A3   | PIK3AP1  | 1.15E-09 | 2.02E-07    | 0.428643966  | SLC2A3->SP1->ESR1->IGF1R->PIK3R1->PIK3AP1                                                                                  | 242 | 0.00345 |
| APOBEC1  | KLRD1    | 1.05E-05 | 0.00036853  | -0.317637598 | APOBEC1->APOB->LDLR->APOE->APP->PSEN1->CTNNB1->ERBB2->GRB2->VAV1->SYK->TYROBP->KLRD1                                       | 51  | 0.00345 |
| PIGR     | PTPRH    | 4.08E-06 | 0.000173089 | 0.331365798  | PIGR->CD79A->BLNK->GRB2->MAPK1->ELK1->SRF->PTPRH                                                                           | 60  | 0.00345 |
| C18orf1  | SMAD7    | 6.32E-08 | 5.81E-06    | 0.384899701  | C18orf1->TGFB1->FN1->TGFB1->TGFB1->SMAD7                                                                                   | 118 | 0.00345 |
| SERPINB2 | FCGR3B   | 4.57E-06 | 0.000190801 | 0.329740185  | SERPINB2->PLAU->JUN->MAPK8->IRS1->PIK3R1->CBL->SYK->FCER1G->FCGR3B                                                         | 59  | 0.0035  |
| PTGER3   | MARCKS   | 3.39E-06 | 0.000149655 | 0.333972228  | PTGER3->KNG1->EGF->SRC->GJA1->PRKCA->MARCKS                                                                                | 61  | 0.0035  |
| PSMB9    | PIK3AP1  | 3.05E-06 | 0.000137774 | 0.335429183  | PSMB9->PSMB7->UCHL5->PSMD4->UBC->EGFR->GRB2->PIK3R1->PIK3AP1                                                               | 61  | 0.0035  |
| HSPB1    | ATP6V1E1 | 1.56E-07 | 1.19E-05    | 0.374080781  | HSPB1->MAPKAPK2->MAPK14->CREB1->EP300->RELA->CHUK->TRAF2->TNFRSF11A->TNFSF11->TCIRG1->ATP6V1B1->ATP6V1D->ATP6V1A->ATP6V1E1 | 97  | 0.00355 |
| SERPINB2 | MID1     | 1.06E-06 | 5.86E-05    | -0.34978638  | SERPINB2->PLAU->JUN->RUNX2->SP7->MID1                                                                                      | 77  | 0.00355 |
| NOP10    | FCGR3B   | 6.15E-06 | 0.000242377 | 0.325505349  | NOP10->DKC1->TERT->AKT1->RAC1->VAV1->SYK->FCER1G->FCGR3B                                                                   | 59  | 0.00355 |
| NOP10    | SUV420H1 | 8.79E-08 | 7.45E-06    | -0.380994186 | NOP10->DKC1->RUVBL1->CTNNB1->AR->NCOA2->SUV420H1                                                                           | 110 | 0.0036  |
| FCRL5    | HLA-DRA  | 1.14E-07 | 9.20E-06    | 0.377903932  | FCRL5->BCL9->CTNNB1->CCND1->CREB1->CIITA->HLA-DRA                                                                          | 106 | 0.0036  |
| MAP7D1   | GFPT1    | 6.72E-09 | 9.02E-07    | -0.410142671 | MAP7D1->ARTN->GFRA1->RET->SHC1->EGFR->UBC->TP53->ATF3->ATF4->ASNS->GLUL->GFPT1                                             | 169 | 0.0036  |
| SLC11A1  | SLA      | 6.49E-08 | 5.92E-06    | 0.384574921  | SLC11A1->ZBTB17->MYC->SP1->HDAC1->TAL1->LMO2->LDB1->LHX3->IFT172->SLA                                                      | 128 | 0.00365 |
| GAS1     | ABCB1    | 1.03E-05 | 0.000361709 | -0.317964492 | GAS1->SHH->FGF8->FGFR1->PLCG1->EGFR->UBC->TP53->ABCB1                                                                      | 55  | 0.00365 |
| ANGPTL4  | BCL11A   | 1.16E-07 | 9.36E-06    | -0.377625227 | ANGPTL4->LPL->APOE->APP->PSEN1->CTNNB1->AR->NCOA2->BCL11A                                                                  | 107 | 0.00365 |
| PITX1    | LPHN2    | 5.90E-08 | 5.53E-06    | -0.385694506 | PITX1->LHB->LHCGR->ARRB2->MAPK1->MYC->EP300->SMAD2->TGFB1->FKBP1A->RYR1->HOMER1->SHANK2->LPHN2                             | 132 | 0.00365 |

|         |          |          |             |              |                                                                                                             |     |         |
|---------|----------|----------|-------------|--------------|-------------------------------------------------------------------------------------------------------------|-----|---------|
| EEF1B2  | KCNQ2    | 3.38E-07 | 2.33E-05    | 0.36450214   | EEF1B2->RPL6->RPL5->MDM2->AKT1->RAC1->IQGAP1->CALM1->KCNQ2                                                  | 88  | 0.0037  |
| NFIB    | HMOX1    | 9.84E-06 | 0.000349017 | -0.318658126 | NFIB->HNF1A->HNF4A->SMAD4->SMAD2->EP300->HIF1A->HMOX1                                                       | 58  | 0.0037  |
| SLC11A1 | SUV420H1 | 1.00E-07 | 8.31E-06    | -0.379434349 | SLC11A1->ZBTB17->MYC->ESR1->NCOA2->SUV420H1                                                                 | 112 | 0.00375 |
| IGHD    | PIK3AP1  | 2.34E-07 | 1.69E-05    | 0.369109163  | IGHD->GHRH->GCG->LEP->STAT3->JAK2->SHC1->PIK3R1->PIK3AP1                                                    | 97  | 0.00375 |
| RNF43   | SHANK2   | 8.01E-08 | 6.96E-06    | 0.382101602  | RNF43->AKAP8L->DHX9->SF3A2->CD2BP2->CD2->LCK->LCP2->VAV1->RAC1->AKT1->MTOR->FKBP1A->RYR1->HOMER1->SHANK2    | 128 | 0.00375 |
| COL4A5  | CASP9    | 2.34E-05 | 0.00070028  | 0.305562692  | COL4A5->COL4A3->COL4A4->IGBP1->PPP2CA->SGOL1->PLK1->CDC25C->CHEK2->TP53->APAF1->CASP9                       | 46  | 0.00385 |
| COL4A5  | KCNQ2    | 1.25E-06 | 6.75E-05    | 0.347534523  | COL4A5->COL4A3->COL4A4->IGBP1->PPP2CA->SGOL1->PLK1->CDC25C->CHEK2->TP53->EP300->CREB1->CAMK2B->CALM1->KCNQ2 | 79  | 0.00385 |
| MAVS    | SLA      | 9.12E-08 | 7.67E-06    | -0.380553125 | MAVS->IRF3->CREBBP->TP53->BRCA1->RBBP8->LMO4->LDB1->LHX3->IFT172->SLA                                       | 125 | 0.0039  |
| CCL7    | SLA      | 1.06E-07 | 8.66E-06    | 0.378714623  | CCL7->CCR1->CCL5->NFKB1->RELA->HDAC1->TAL1->LMO2->LDB1->LHX3->IFT172->SLA                                   | 126 | 0.00395 |
| PTGER1  | RASGRP2  | 1.01E-07 | 8.33E-06    | 0.379316859  | PTGER1->BDKRB2->KNG1->EGF->EGFR->SOS1->HRAS->RAF1->KRAS->RASGRP2                                            | 126 | 0.00395 |
| CXCL14  | C18orf10 | 1.79E-09 | 2.97E-07    | -0.424136403 | CXCL14->CXCR4->CD4->LCK->NFKBIA->NFKB1->C18orf10                                                            | 275 | 0.00395 |
| IGKC    | HLA-DRA  | 1.70E-05 | 0.000543441 | 0.31048081   | IGKC->ERBB4->EGF->SRC->ESR1->EP300->CREB1->CIITA->HLA-DRA                                                   | 50  | 0.00395 |
| PGRMC1  | UPP1     | 1.14E-07 | 9.20E-06    | -0.377935065 | PGRMC1->M6PR->IGF1->IRS1->MAPK8->TP53->RRM2B->RRM1->RRM2->TYMS->TK1->CDA->TYMP->UPP1                        | 126 | 0.004   |
| CYP4F2  | JAK2     | 1.98E-06 | 9.70E-05    | -0.341347671 | CYP4F2->PTGS2->IL6->STAT3->JAK2                                                                             | 78  | 0.00405 |
| FCRL5   | THEMIS   | 3.16E-09 | 4.83E-07    | 0.418170204  | FCRL5->BCL9->CTNNB1->CCND1->STAT3->IL2->THEMIS                                                              | 272 | 0.0041  |
| CASP1   | RASGEF1B | 9.27E-09 | 1.18E-06    | 0.406641905  | CASP1->IL18->IFNG->IL2->STAT3->RAC1->ARHGDI1->RHOA->ROCK2->PPP1R12A->PRKG1->MRV1->PRKG2->RASGEF1B           | 179 | 0.0041  |
| SATB2   | SCML1    | 8.21E-09 | 1.07E-06    | 0.407971543  | SATB2->HOXA2->CD1D->B2M->CD8A->IL2->STAT3->EP300->TP53->HDAC1->SIN3A->MECP2->CDKL5->NHS->SCML1              | 201 | 0.0041  |
| ANGPTL4 | CRIM1    | 7.71E-08 | 6.79E-06    | -0.382547341 | ANGPTL4->LPL->APOE->APP->PSEN1->CTNNB1->SMAD4->SMAD1->BMPR1A->BMP4->CRIM1                                   | 141 | 0.00415 |
| NOP10   | CCL18    | 1.89E-06 | 9.33E-05    | 0.341987632  | NOP10->DKC1->RUVB1->CTNNB1->BTRC->NFKBIA->NFKB1->CCL5->CCR3->CCL18                                          | 79  | 0.00415 |
| RNF43   | ENPP3    | 7.10E-09 | 9.45E-07    | 0.40954811   | RNF43->AKAP8L->DHX9->SF3A2->CD2BP2->CD2->LCK->IL2->IL5->IL3->ENPP3                                          | 208 | 0.00415 |
| NFIB    | FCGR3B   | 2.71E-07 | 1.94E-05    | -0.367260031 | NFIB->HNF1A->HNF4A->SMAD4->SMAD2->EP300->STAT3->EGFR->CBL->SYK->FCER1G->FCGR3B                              | 105 | 0.0042  |
| SLC2A3  | CXCL13   | 1.24E-08 | 1.48E-06    | 0.403423543  | SLC2A3->SP1->EP300->STAT1->CXCL9->CXCR3->CXCL13                                                             | 199 | 0.00425 |
| CEACAM1 | SPINK5   | 1.76E-08 | 2.00E-06    | 0.399540856  | CEACAM1->PTPN11->GRB2->ERBB2->CTNNB1->CDH1->JUP->DSG1->KLK5->SPINK5                                         | 192 | 0.00425 |
| CCL7    | CRIM1    | 3.11E-07 | 2.17E-05    | -0.365556417 | CCL7->CCR5->CD4->IFNG->IFNGR1->STAT1->EP300->SMAD2->SMAD4->SMAD1->BMPR1A->BMP4->CRIM1                       | 105 | 0.00425 |
| NOP10   | CTSA     | 6.07E-06 | 0.000239818 | -0.325694638 | NOP10->DKC1->TERT->AKT1->TSC2->YWHAZ->GP1BA->F2->GLA->GLB1->CTSA                                            | 68  | 0.00425 |
| PIGR    | CD177    | 1.97E-06 | 9.62E-05    | 0.341483242  | PIGR->CD79A->BLNK->GRB2->MAPK1->JUN->SPI1->PRTN3->CD177                                                     | 80  | 0.00425 |
| MAP7D1  | UPP1     | 5.75E-08 | 5.41E-06    | 0.385993048  | MAP7D1->ARTN->GFRA1->RET->SHC1->EGFR->UBC->TP53->RRM2B->RRM1->RRM2->TYMS->TK1->CDA->TYMP->UPP1              | 154 | 0.00425 |
| MAVS    | GFPT1    | 1.09E-05 | 0.000378441 | 0.317161671  | MAVS->IRF3->CREBBP->TP53->ATF3->ATF4->ASNS->GLUL->GFPT1                                                     | 64  | 0.00425 |
| SLC2A3  | PIK3CG   | 1.93E-08 | 2.17E-06    | 0.398540596  | SLC2A3->SP1->ESR1->AKT1->PIK3CG                                                                             | 193 | 0.0043  |
| PGRMC1  | FPR1     | 1.76E-07 | 1.31E-05    | -0.372632759 | PGRMC1->M6PR->IGF1->IRS1->MAPK8->TP53->NPM1->NCL->S100A11->ANXA1->FPR1                                      | 120 | 0.0043  |
| PLEKHB1 | KCNQ2    | 4.06E-09 | 6.01E-07    | 0.415546597  | PLEKHB1->SELPLG->SELE->NFKB1->RELA->EP300->CREB1->CAMK2B->CALM1->KCNQ2                                      | 298 | 0.0043  |

|            |         |          |             |              |                                                                                                                 |     |         |
|------------|---------|----------|-------------|--------------|-----------------------------------------------------------------------------------------------------------------|-----|---------|
| ZC3H12A    | ASS1    | 3.68E-05 | 0.000997589 | 0.298463881  | ZC3H12A->CCL2->CCR5->CD4->LCK->LCP2->VAV1->RAC1->AKT1->NOS3->ARG2->OTC->ASS1                                    | 45  | 0.0043  |
| MAP7D1     | KANK4   | 7.75E-09 | 1.01E-06    | 0.408587537  | MAP7D1->ARTN->GFRA1->RET->SHC1->EGFR->UBC->TP53->TBP->POLR2A->POLR2H->POLR3D->POLR3F->POLR3C->KANK4             | 233 | 0.0043  |
| CDON       | PURB    | 1.15E-06 | 6.28E-05    | -0.348687667 | CDON->CDH2->CTNNB1->SRC->VCL->TPM1->TNNT2->MYBPC3->MYH6->PURB                                                   | 86  | 0.0043  |
| IGJ        | CD177   | 1.49E-07 | 1.15E-05    | 0.37463569   | IGJ->IL2->JUN->SPI1->PRTN3->CD177                                                                               | 129 | 0.00435 |
| SERPINB2   | MYEF2   | 2.83E-05 | 0.000817135 | -0.302607847 | SERPINB2->PLAU->NFKB1->RELA->HDAC1->SIN3A->HDAC9->MYEF2                                                         | 48  | 0.0044  |
| CXCL14     | JAK2    | 8.99E-08 | 7.58E-06    | -0.380728109 | CXCL14->CXCR4->CD4->LCK->PTPN6->JAK2                                                                            | 143 | 0.0044  |
| IGHD       | ACCN2   | 2.00E-05 | 0.000618861 | -0.307975304 | IGHD->GHRH->GCG->LEP->STAT3->SRC->GJA1->PRKCA->PICK1->ACCN2                                                     | 58  | 0.0044  |
| CEACAM1    | GFPT1   | 5.60E-06 | 0.000225004 | 0.326847894  | CEACAM1->PTPN11->IRS1->MAPK8->JUN->ATF3->ATF4->ASNS->GLUL->GFPT1                                                | 72  | 0.00445 |
| PTGER1     | RUNDC3A | 5.19E-08 | 4.96E-06    | -0.387202742 | PTGER1->BDKRB2->KNG1->EGF->EGFR->NCK1->TNIK->RAP2A->RUNDC3A                                                     | 165 | 0.00445 |
| RB1CC1     | UPP1    | 6.36E-06 | 0.000247997 | -0.325030505 | RB1CC1->PTK2->PTEN->TP53->RRM2B->RRM1->RRM2->TYMS->TK1->CDA->TYMP->UPP1                                         | 71  | 0.0045  |
| PTGER1     | HMOX1   | 7.42E-06 | 0.000281735 | 0.322791307  | PTGER1->BDKRB2->KNG1->EGF->EGFR->UBC->HIF1A->HMOX1                                                              | 70  | 0.0045  |
| VIP        | SPINK5  | 1.68E-08 | 1.93E-06    | 0.400085759  | VIP->VIPR1->ADCYAP1->ADCYAP1R1->GCG->LEP->STAT3->SRC->CTNNB1->CDH5->JUP->DSG1->KLF5->SPINK5                     | 213 | 0.0045  |
| MAP7D1     | CCL18   | 3.36E-08 | 3.42E-06    | 0.392234765  | MAP7D1->ARTN->GFRA1->RET->GRB2->LCP2->LCK->CD4->CCR5->CCL13->CCR3->CCL18                                        | 178 | 0.00455 |
| MAP7D1     | KLRD1   | 1.39E-07 | 1.09E-05    | 0.3755209    | MAP7D1->ARTN->GFRA1->RET->GRB2->VAV1->SYK->TYROBP->KLRD1                                                        | 139 | 0.00455 |
| APOBEC1    | ETV6    | 1.83E-05 | 0.000577808 | 0.309315233  | APOBEC1->APOB->LDLR->APOE->APP->PSEN1->CTNNB1->ERBB2->GRB2->JAK2->ETV6                                          | 61  | 0.0046  |
| EEF1B2     | MARCKS  | 1.79E-05 | 0.000566706 | -0.309672663 | EEF1B2->RPL6->RPL5->MDM2->AKT1->RAC1->PAK1->CDC42->PLD1->PRKCA->MARCKS                                          | 61  | 0.0046  |
| LEPRE1     | KANK4   | 1.01E-07 | 8.33E-06    | 0.379358448  | LEPRE1->PPIB->BSG->MMP1->JUN->MAPK8->TP53->TBP->POLR2A->POLR2H->POLR3D->POLR3F->POLR3C->KANK4                   | 147 | 0.0046  |
| CHST2      | KLRD1   | 8.32E-09 | 1.08E-06    | 0.407819429  | CHST2->SELL->CD34->MYB->CREBBP->TP53->UBC->EGFR->CBL->SYK->TYROBP->KLRD1                                        | 285 | 0.0046  |
| GAS1       | ST3GAL1 | 9.29E-08 | 7.79E-06    | 0.380337648  | GAS1->SHH->FGF8->FGFR2->FGF23->GALNT3->GCNT1->ST3GAL1                                                           | 152 | 0.00465 |
| GAS1       | GFPT1   | 7.76E-06 | 0.000289707 | -0.322147554 | GAS1->SHH->FGF8->FGFR1->PLCG1->EGFR->UBC->TP53->ATF3->ATF4->ASNS->GLUL->GFPT1                                   | 72  | 0.00465 |
| SERPINB2   | CCL18   | 5.67E-06 | 0.000227478 | 0.326672778  | SERPINB2->PLAU->NFKB1->CCL5->CCR3->CCL18                                                                        | 75  | 0.00465 |
| FCRL5      | ZAP70   | 1.28E-06 | 6.86E-05    | 0.347281181  | FCRL5->BCL9->CTNNB1->ERBB2->GRB2->LCP2->ZAP70                                                                   | 88  | 0.00465 |
| C19orf61   | MARCKS  | 6.56E-06 | 0.000254633 | -0.324581454 | C19orf61->UPF1->UPF2->LSM1->LSM7->SNRPD3->SF3A2->CD2BP2->CD2->LCK->LCP2->GRB2->WASL->CDC42->PLD1->PRKCA->MARCKS | 74  | 0.0047  |
| LEPRE1     | FPR1    | 1.98E-05 | 0.000615484 | 0.308131483  | LEPRE1->PPIB->BSG->MMP1->JUN->MAPK8->TP53->NPM1->NCL->S100A11->ANXA1->FPR1                                      | 62  | 0.00475 |
| CHST2      | CXCL13  | 9.29E-09 | 1.18E-06    | 0.406622037  | CHST2->SELL->CD34->MYB->CREBBP->RELA->NFKB1->CCL5->CCR3->CCL11->CXCR3->CXCL13                                   | 267 | 0.00475 |
| SLC11A1    | CLEC4E  | 1.14E-08 | 1.39E-06    | 0.404334566  | SLC11A1->ZBTB17->MYC->EP300->RELA->IKKB->BCL10->CARD9->CLEC4E                                                   | 270 | 0.0048  |
| CXCL14     | A1CF    | 4.62E-08 | 4.53E-06    | 0.388543355  | CXCL14->CXCR4->CD4->LCK->LCP2->GRB2->ERBB2->CTNNB1->PSEN1->APP->APOE->LDLR->APOB->APOBEC1->A1CF                 | 177 | 0.00485 |
| SLC11A1    | UPP1    | 3.24E-05 | 0.000903817 | 0.300500114  | SLC11A1->ZBTB17->MYC->EP300->TP53->RRM2B->RRM1->RRM2->TYMS->TK1->CDA->TYMP->UPP1                                | 53  | 0.0049  |
| HSPB1      | IDH2    | 3.06E-05 | 0.000868814 | -0.301402532 | HSPB1->MAPKAPK2->MAPK14->CREB1->CCND1->CTNNB1->PITX2->SUCLG1->SDHB->FH->MDH2->CS->ACO2->IDH2                    | 53  | 0.0049  |
| GADD45GIP1 | COPA    | 2.76E-06 | 0.000126612 | -0.336797846 | GADD45GIP1->GADD45G->PCNA->CCND1->CTNNB1->SRC->GNB2L1->PRKCE->COPB2->COPB1->COPA                                | 83  | 0.0049  |
| PIGR       | IDH2    | 2.72E-05 | 0.000791871 | 0.303228246  | PIGR->CD79A->BLNK->GRB2->ERBB2->CTNNB1->PITX2->SUCLG1->SDHB->FH->MDH2->CS->ACO2->IDH2                           | 55  | 0.0049  |

|          |          |          |             |              |                                                                                             |     |         |
|----------|----------|----------|-------------|--------------|---------------------------------------------------------------------------------------------|-----|---------|
| CD79A    | RASGRP2  | 1.73E-05 | 0.000549464 | 0.310220262  | CD79A->BLNK->GRB2->PIK3R1->PIK3CA->KRAS->RASGRP2                                            | 66  | 0.00505 |
| ANGPTL4  | GFPT1    | 1.14E-06 | 6.23E-05    | -0.348843917 | ANGPTL4->LPL->APOE->APP->PSEN1->CTNNB1->GSK3B->TP53->ATF3->ATF4->ASNS->GLUL->GFPT1          | 101 | 0.00505 |
| AKR1C3   | ESRRG    | 2.42E-05 | 0.000721475 | 0.305027128  | AKR1C3->PTGDS->PTGS2->IL6->STAT3->EP300->SIRT1->PPARGC1A->ESRRG                             | 62  | 0.00505 |
| SERPINB2 | CRIM1    | 9.84E-07 | 5.56E-05    | -0.350751563 | SERPINB2->PLAU->JUN->SMAD4->SMAD1->BMPR1A->BMP4->CRIM1                                      | 104 | 0.0051  |
| HLA-DQB2 | CD2      | 5.56E-07 | 3.48E-05    | 0.358177996  | HLA-DQB2->ZFYE9->SMAD2->EP300->STAT3->IL2->LCK->CD2                                         | 109 | 0.0051  |
| MAVS     | CLEC4E   | 2.27E-08 | 2.48E-06    | -0.39666576  | MAVS->IRF3->CREBBP->RELA->IKKBK->BCL10->CARD9->CLEC4E                                       | 266 | 0.0051  |
| MAVS     | PIK3AP1  | 2.06E-05 | 0.000632555 | -0.307548699 | MAVS->IRF3->CREBBP->TP53->MAPK8->IRS1->PIK3R1->PIK3AP1                                      | 63  | 0.0051  |
| RB1CC1   | SLITRK6  | 2.52E-08 | 2.69E-06    | -0.395527871 | RB1CC1->PTK2->GRB2->NTRK1->SLITRK6                                                          | 259 | 0.00515 |
| PTGER1   | PURB     | 2.84E-07 | 2.01E-05    | -0.366683023 | PTGER1->BDKRB2->KNG1->EGF->SRC->VCL->TPM1->TNNT2->MYBPC3->MYH6->PURB                        | 134 | 0.00515 |
| CXCL14   | SLC25A11 | 2.97E-08 | 3.08E-06    | -0.393633577 | CXCL14->CXCR4->CD4->IFNG->IL2->STAT3->EP300->TP53->BCL2->BNIP3->BCKDHB->DLD->OGDH->SLC25A11 | 250 | 0.00515 |
| FCRL5    | SLA      | 4.50E-08 | 4.43E-06    | 0.388859956  | FCRL5->BCL9->CTNNB1->TCF4->TAL1->LMO2->LDB1->LHX3->IFT172->SLA                              | 203 | 0.00515 |
| IGKC     | CLEC2D   | 1.98E-08 | 2.22E-06    | 0.398235809  | IGKC->ERBB4->EGF->EGFR->UBC->RIPK1->TRAF2->TNFRSF11A->TNFSF11->CLEC2D                       | 294 | 0.00515 |
| NOP10    | VNN2     | 9.00E-08 | 7.58E-06    | 0.380717677  | NOP10->DKC1->RUVBL1->CTNNB1->BTRC->NFKBIA->NFKB1->ICAM1->ITGB2->VNN2                        | 170 | 0.0052  |
| PARVA    | KANK4    | 4.13E-07 | 2.73E-05    | 0.361977094  | PARVA->ILK->AKT1->MDM2->TP53->TBP->POLR2A->POLR2H->POLR3D->POLR3F->POLR3C->KANK4            | 127 | 0.0052  |
| RNF43    | HMOX1    | 4.81E-07 | 3.09E-05    | -0.360033968 | RNF43->AKAP8L->DHX9->SF3A2->YBX1->TP53->HIF1A->HMOX1                                        | 115 | 0.0052  |
| CDON     | RASGRP2  | 1.02E-05 | 0.000358379 | 0.318167154  | CDON->SHH->FGF8->FGFR1->FRS2->PTPN11->KRAS->RASGRP2                                         | 77  | 0.00525 |
| PITX1    | MARCKS   | 2.49E-05 | 0.000738711 | -0.304587286 | PITX1->LHB->LHCGR->ARRB2->MAPK1->GRB2->WASL->CDC42->PLD1->PRKCA->MARCKS                     | 63  | 0.00525 |
| MAP7D1   | TFCP2    | 5.02E-07 | 3.20E-05    | -0.359506183 | MAP7D1->ARTN->GFRA1->RET->SHC1->EGFR->STAT3->EP300->YY1->TFCP2                              | 118 | 0.0053  |
| HSPB1    | NUPR1    | 4.89E-06 | 0.000200576 | 0.328804581  | HSPB1->MAPKAPK2->MAPK14->ATF2->MAPK8->TP53->NUPR1                                           | 83  | 0.0054  |
| MAGT1    | FCGR3B   | 6.22E-08 | 5.77E-06    | -0.385084259 | MAGT1->DDOST->SSR4->RPS5->RPL5->MDM2->AKT1->RAC1->VAV1->SYK->FCER1G->FCGR3B                 | 203 | 0.0054  |
| CD79A    | CD177    | 1.29E-05 | 0.000435268 | 0.314652442  | CD79A->BLNK->GRB2->MAPK1->JUN->SPI1->PRTN3->CD177                                           | 76  | 0.0055  |
| ANGPTL4  | ESRRG    | 2.09E-05 | 0.000638861 | -0.307321    | ANGPTL4->LPL->APOE->APP->PSEN1->CTNNB1->GSK3B->TP53->SIRT1->PPARGC1A->ESRRG                 | 68  | 0.0055  |
| VIP      | RPRM     | 1.92E-06 | 9.43E-05    | 0.341771094  | VIP->VIPR1->ADCYAP1->POMC->NR4A1->BCL2->TP53->RPRM                                          | 101 | 0.0055  |
| PSMB9    | CLEC4E   | 3.90E-08 | 3.90E-06    | 0.390514114  | PSMB9->PSMB7->UCHL5->PSMD4->UBC->IKBK->BCL10->CARD9->CLEC4E                                 | 266 | 0.00555 |
| CD79A    | CLEC2D   | 4.10E-08 | 4.07E-06    | 0.389933614  | CD79A->BLNK->GRB2->EGFR->UBC->RIPK1->TRAF2->TNFRSF11A->TNFSF11->CLEC2D                      | 270 | 0.0056  |
| SATB2    | ARHGEF19 | 1.38E-06 | 7.30E-05    | 0.346225502  | SATB2->HOXA2->CD1D->B2M->CD8A->IL2->STAT3->SRC->CTNNB1->DVL1->DAAM1->ARHGEF19               | 108 | 0.00565 |
| PTGER1   | SNAPIN   | 3.77E-06 | 0.000161877 | 0.332481584  | PTGER1->BDKRB2->KNG1->EGF->EGFR->PLCG1->PDGFRB->SLC9A3R1->CFTR->STX1A->SNAP25->SNAPIN       | 87  | 0.00575 |
| SERPINB2 | CRYZ     | 1.55E-05 | 0.000509266 | 0.311826181  | SERPINB2->PLAU->JUN->IL2->STAT3->RAC1->NCF2->DECR1->CRYZ                                    | 76  | 0.0058  |
| CHST2    | TNFRSF1B | 5.64E-08 | 5.33E-06    | 0.386232005  | CHST2->SELL->CD34->MYB->CREBBP->RELA->CHUK->TRAF2->TNFRSF1B                                 | 255 | 0.00585 |
| MAP7D1   | FCGR3B   | 2.35E-07 | 1.69E-05    | 0.369058127  | MAP7D1->ARTN->GFRA1->RET->GRB2->VAV1->SYK->FCER1G->FCGR3B                                   | 159 | 0.00585 |
| MBNL2    | ITGA6    | 1.54E-06 | 7.93E-05    | 0.344796627  | MBNL2->CCT3->PPP2CA->SGOL1->PLK1->CDC25C->CHEK2->TP53->PTEN->PTK2->PXN->ITGA4->ITGB1->ITGA6 | 110 | 0.00585 |
| PGRMC1   | VNN2     | 6.43E-08 | 5.88E-06    | -0.384692931 | PGRMC1->M6PR->PLIN3->IGF2R->PLAUR->PLG->FN1->ITGB1->ITGA8->ITGB2->VNN2                      | 243 | 0.0059  |
| PTGER1   | LMBR1L   | 9.88E-07 | 5.57E-05    | 0.350691779  | PTGER1->BDKRB2->KNG1->KLBK1->A2M->LYZ->LCN1-                                                | 114 | 0.0059  |

|         |          |          |             |              |                                                                                                                           |     |         |
|---------|----------|----------|-------------|--------------|---------------------------------------------------------------------------------------------------------------------------|-----|---------|
|         |          |          |             |              | >LMBR1L                                                                                                                   |     |         |
| CASP1   | CLEC2D   | 5.48E-08 | 5.19E-06    | 0.386571791  | CASP1->IL18->IL1B->NFKB1->CHUK->TRAF2->TNFRSF11A->TNFSF11->CLEC2D                                                         | 270 | 0.0059  |
| IGKC    | TOX2     | 7.24E-08 | 6.47E-06    | 0.383285204  | IGKC->ERBB4->EGF->EGFR->UBC->TP53->BCL2->NR4A1->ZNF461->TOX2                                                              | 231 | 0.00595 |
| RPS2    | CTSA     | 3.24E-05 | 0.000904596 | -0.300470286 | RPS2->RPS3->RPL5->MDM2->AKT1->TSC2->YWHAZ->GP1BA->F2->GLA->GLB1->CTSA                                                     | 68  | 0.006   |
| SLC2A3  | CYP2J2   | 7.52E-08 | 6.64E-06    | -0.382845305 | SLC2A3->SP1->TP53->KAT5->PLA2G4A->CYP2J2                                                                                  | 246 | 0.00605 |
| PGRMC1  | TFCP2    | 3.81E-06 | 0.000163285 | 0.332340611  | PGRMC1->M6PR->IGF1->IGF1R->ESR1->EP300->YY1->TFCP2                                                                        | 90  | 0.00605 |
| RABGEF1 | RASGRP2  | 2.35E-05 | 0.000703186 | -0.305483827 | RABGEF1->RABEP1->RAB5A->EGFR->SOS1->HRAS->RAF1->KRAS->RASGRP2                                                             | 72  | 0.0061  |
| SAV1    | MYEF2    | 2.69E-06 | 0.00012368  | -0.337162482 | SAV1->RASSF1->HRAS->PIK3CA->PTEN->TP53->HDAC1->SIN3A->HDAC9->MYEF2                                                        | 103 | 0.0061  |
| SLC2A3  | JAK2     | 1.44E-07 | 1.12E-05    | 0.37507784   | SLC2A3->SP1->EP300->STAT1->JAK2                                                                                           | 187 | 0.00615 |
| SOX11   | HMOX1    | 6.60E-07 | 3.97E-05    | 0.355964228  | SOX11->BNIP3->BCL2->TP53->HIF1A->HMOX1                                                                                    | 136 | 0.00615 |
| SOX11   | KANK4    | 7.33E-08 | 6.53E-06    | 0.383146141  | SOX11->BNIP3->BCL2->TP53->TBP->POLR2A->POLR2H->POLR3D->POLR3F->POLR3C->KANK4                                              | 252 | 0.00615 |
| CRB3    | BCL11A   | 4.97E-06 | 0.000203294 | -0.328575624 | CRB3->PARD6A->CDC42->IQGAP1->RAC1->AKT1->ESR1->NCOA2->BCL11A                                                              | 91  | 0.00615 |
| ATP2B4  | ATP6V1E2 | 1.21E-06 | 6.52E-05    | -0.348063834 | ATP2B4->CALM1->CAMK2B->CREB1->CREBBP->RELA->CHUK->TRAF2->TNFRSF11A->TNFSF11->TCIRG1->ATP6V1B1->ATP6V1D->ATP6V1A->ATP6V1E2 | 122 | 0.0062  |
| MAVS    | SUV420H1 | 2.14E-06 | 0.000102784 | 0.340344408  | MAVS->IRF3->CREBBP->NCOA3->AR->NCOA2->SUV420H1                                                                            | 109 | 0.0062  |
| APOBEC1 | SP5      | 5.79E-06 | 0.000230376 | 0.32638113   | APOBEC1->APOB->LDLR->APOE->APP->PSEN1->CTNNB1->SP5                                                                        | 91  | 0.00625 |
| TET3    | SNAPIN   | 3.35E-07 | 2.31E-05    | -0.364633868 | TET3->NANOG->KLF4->CTNNB1->ERBB2->GRB2->PDGFRB->SLC9A3R1->CFTR->STX1A->SNAP25->SNAPIN                                     | 163 | 0.00625 |
| SATB2   | CRIM1    | 1.89E-07 | 1.40E-05    | 0.371727531  | SATB2->HOXA2->CD1D->B2M->CD8A->IL2->STAT3->EP300->SMAD2->SMAD4->SMAD1->BMPRI1A->BMP4->CRIM1                               | 173 | 0.00625 |
| CHRNA3  | ARHGEF19 | 2.70E-05 | 0.000788308 | 0.303342166  | CHRNA3->PSMA4->UCHL5->PSMD4->UBC->TP53->GSK3B->CTNNB1->DVL1->DAAM1->ARHGEF19                                              | 71  | 0.0063  |
| RNF43   | CCL18    | 2.06E-07 | 1.52E-05    | -0.37065317  | RNF43->AKAP8L->DHX9->SF3A2->CD2BP2->CD2->LCK->CD4->CCR5->CCL5->CCR3->CCL18                                                | 175 | 0.0063  |
| CXCL14  | CRYZ     | 1.35E-07 | 1.07E-05    | -0.375846494 | CXCL14->CXCR4->CD4->LCK->LCP2->VAV1->RAC1->NCF2->DECR1->CRYZ                                                              | 209 | 0.00635 |
| PGRMC1  | CD2      | 1.07E-05 | 0.000374305 | -0.317374151 | PGRMC1->M6PR->IGF1->IRS1->GRB2->LCP2->LCK->CD2                                                                            | 86  | 0.0064  |
| ANGPTL4 | CCL18    | 1.88E-06 | 9.30E-05    | 0.342080948  | ANGPTL4->LPL->APOE->APP->PSEN1->CTNNB1->BTRC->NFKBIA->NFKB1->CCL5->CCR3->CCL18                                            | 113 | 0.0064  |
| NOP10   | DYNC1I2  | 2.54E-05 | 0.000749668 | -0.304312472 | NOP10->DKC1->RUVBL1->KAT5->TP53->CHEK1->CDC25C->PLK1->NUDC->PAFAH1B1->DCTN1->DCTN2->DYNC1I2                               | 74  | 0.0064  |
| IGHD    | APBB1IP  | 8.33E-06 | 0.000306797 | 0.321112596  | IGHD->GHRH->GCG->LEP->STAT3->SRC->PTK2->TLN1->APBB1IP                                                                     | 89  | 0.0064  |
| PQBP1   | BCL11A   | 3.23E-06 | 0.000143955 | 0.334653023  | PQBP1->TXNL4A->CD2BP2->CD2->LCK->ZAP70->SHC1->IGF1R->ESR1->NCOA2->BCL11A                                                  | 104 | 0.00645 |
| PRF1    | CLEC2D   | 8.31E-08 | 7.11E-06    | 0.381660275  | PRF1->CD8A->LCK->NFKBIA->CHUK->TRAF2->TNFRSF11A->TNFSF11->CLEC2D                                                          | 273 | 0.0065  |
| FCRL5   | KLRD1    | 1.74E-06 | 8.81E-05    | 0.343106475  | FCRL5->BCL9->CTNNB1->ERBB2->EGFR->CBL->SYK->TYROBP->KLRD1                                                                 | 117 | 0.0065  |
| GAS1    | NUPR1    | 7.82E-06 | 0.000290859 | 0.322029935  | GAS1->SHH->FGF8->FGFR1->PLCG1->EGFR->UBC->TP53->NUPR1                                                                     | 92  | 0.00655 |
| ANGPTL4 | SUV420H1 | 7.78E-07 | 4.58E-05    | -0.3538353   | ANGPTL4->LPL->APOE->APP->PSEN1->CTNNB1->AR->NCOA2->SUV420H1                                                               | 144 | 0.00665 |
| PRF1    | VNN2     | 3.64E-07 | 2.46E-05    | 0.363594006  | PRF1->CD8A->IL2->STAT3->IL6->ICAM1->ITGB2->VNN2                                                                           | 168 | 0.00665 |
| RNF43   | HLA-DRA  | 1.49E-06 | 7.73E-05    | -0.345245597 | RNF43->AKAP8L->DHX9->SF3A2->YBX1->TP53->EP300->CREB1->CIITA->HLA-DRA                                                      | 130 | 0.0067  |
| CD79A   | THEMIS   | 2.09E-07 | 1.53E-05    | 0.370493018  | CD79A->SYK->LCK->IL2->THEMIS                                                                                              | 190 | 0.00675 |
| ANGPTL4 | ABCB1    | 1.46E-05 | 0.000484768 | -0.312745377 | ANGPTL4->LPL->APOE->APP->PSEN1->CTNNB1->GSK3B->TP53->ABCB1                                                                | 84  | 0.00675 |



|          |          |          |             |              |                                                                                                                  |     |         |
|----------|----------|----------|-------------|--------------|------------------------------------------------------------------------------------------------------------------|-----|---------|
| MAP7D1   | APBB1IP  | 5.91E-07 | 3.65E-05    | 0.357403116  | MAP7D1->ARTN->GFRA1->RET->GRB2->PTK2->TLN1->APBB1IP                                                              | 156 | 0.00675 |
| NFIB     | MID1     | 2.15E-06 | 0.000102784 | 0.340283992  | NFIB->HNF1A->HNF4A->SMAD4->SMAD1->RUNX2->SP7->MID1                                                               | 119 | 0.00675 |
| IGKC     | THEMIS   | 1.73E-07 | 1.29E-05    | 0.372824575  | IGKC->ERBB4->EGF->SRC->STAT3->IL2->THEMIS                                                                        | 214 | 0.00675 |
| SAV1     | RPRM     | 1.66E-06 | 8.44E-05    | -0.343733166 | SAV1->RASSF1->HRAS->PIK3CA->PTEN->TP53->RPRM                                                                     | 129 | 0.0068  |
| PGRMC1   | CD69     | 4.24E-06 | 0.000179068 | -0.330828944 | PGRMC1->M6PR->PLIN3->IGF2R->PLAUR->PLAU->JUN->IL2->CD69                                                          | 101 | 0.00685 |
| PITX1    | LTF      | 6.22E-06 | 0.000244543 | -0.325340954 | PITX1->LHB->LHCGR->ARRB2->MAPK1->GRB2->ERBB2->CTNNB1->PSEN1->APP->A2M->LYZ->LTF                                  | 96  | 0.00685 |
| ANGPTL4  | MMD      | 5.51E-06 | 0.000221918 | 0.327101039  | ANGPTL4->LPL->APOE->APP->PSEN1->CTNNB1->CCND1->CDK2->CDC6->MCM2->MUT->MMD                                        | 104 | 0.00695 |
| CYP4F2   | ACCN2    | 8.99E-06 | 0.000324246 | 0.319994328  | CYP4F2->PTGS2->IL1B->NFKB1->PRKCA->PICK1->ACCN2                                                                  | 94  | 0.00705 |
| IGHD     | TOX2     | 1.68E-07 | 1.26E-05    | 0.373177976  | IGHD->GHRH->POMC->NR4A1->ZNF461->TOX2                                                                            | 238 | 0.00705 |
| PGRMC1   | FCGR3B   | 1.78E-06 | 8.97E-05    | -0.342797047 | PGRMC1->M6PR->IGF1->IRS1->GRB2->VAV1->SYK->FCER1G->FCGR3B                                                        | 133 | 0.0071  |
| PSMB9    | VNN2     | 5.40E-07 | 3.40E-05    | 0.358566101  | PSMB9->PSMB7->UCHL5->PSMD4->UBC->EGFR->STAT3->IL6->ICAM1->ITGB2->VNN2                                            | 167 | 0.00715 |
| PTGER1   | LTF      | 1.09E-05 | 0.000379232 | -0.317114186 | PTGER1->BDKRB2->KNG1->KLBK1->A2M->LYZ->LTF                                                                       | 93  | 0.0072  |
| LEPRE1   | CYP2J2   | 1.55E-05 | 0.000508928 | -0.311867916 | LEPRE1->PPIB->BSG->MMP1->JUN->MAPK8->TP53->KAT5->PLA2G4A->CYP2J2                                                 | 86  | 0.0072  |
| PQBP1    | MID1     | 3.83E-06 | 0.000163927 | 0.33226614   | PQBP1->TXNL4A->CD2BP2->CD2->LCK->IL2->STAT3->EP300->SP1->SMAD3->RUNX2->SP7->MID1                                 | 109 | 0.00725 |
| CHRNA3   | ATP6V1E2 | 1.83E-06 | 9.14E-05    | -0.342459824 | CHRNA3->PSMA4->UCHL5->PSMD4->UBC->RIPK1->TRAF2->TNFRSF11A->TNFSF11->TCIRG1->ATP6V1B1->ATP6V1D->ATP6V1A->ATP6V1E2 | 139 | 0.0073  |
| PTGER3   | PTPRH    | 6.31E-06 | 0.000247045 | -0.325139129 | PTGER3->KNG1->EGF->GRB2->MAPK1->ELK1->SRF->PTPRH                                                                 | 107 | 0.0074  |
| RNF43    | APBB1IP  | 1.05E-06 | 5.84E-05    | -0.349850518 | RNF43->AKAP8L->DHX9->SF3A2->CD2BP2->CD2->LCK->LCP2->GRB2->PTK2->TLN1->APBB1IP                                    | 157 | 0.0074  |
| PITX1    | CRIM1    | 1.00E-06 | 5.62E-05    | -0.350477646 | PITX1->LHB->LHCGR->ARRB2->MAPK1->JUN->SMAD4->SMAD1->BMPR1A->BMP4->CRIM1                                          | 156 | 0.0074  |
| UBQLN2   | MID1     | 1.33E-06 | 7.06E-05    | 0.346781172  | UBQLN2->PSMD4->UBC->TP53->SP1->SMAD3->RUNX2->SP7->MID1                                                           | 152 | 0.00745 |
| ANGPTL4  | SLA      | 1.11E-06 | 6.09E-05    | 0.349179838  | ANGPTL4->LPL->APOE->APP->PSEN1->CTNNB1->TCF4->TAL1->LMO2->LDB1->LHX3->IFT172->SLA                                | 160 | 0.0075  |
| RNF43    | MYEF2    | 1.42E-06 | 7.46E-05    | 0.345839583  | RNF43->AKAP8L->DHX9->SF3A2->YBX1->TP53->HDAC1->SIN3A->HDAC9->MYEF2                                               | 150 | 0.0075  |
| COL8A1   | LPHN2    | 1.91E-06 | 9.36E-05    | 0.34189212   | COL8A1->COL8A2->ZEB1->CDH1->CTNNB1->SMAD7->TGFB1->FKBP1A->RYR1->HOMER1->SHANK2->LPHN2                            | 142 | 0.00755 |
| SLC22A18 | SNAPIN   | 2.29E-05 | 0.000687347 | -0.305939789 | SLC22A18->CDKN1C->CDK4->RB1->TP53->PTEN->SLC9A3R1->CFTR->STX1A->SNAP25->SNAPIN                                   | 82  | 0.0076  |
| RNF43    | TFCP2    | 3.44E-06 | 0.00015147  | 0.333744534  | RNF43->AKAP8L->DHX9->SF3A2->YBX1->TP53->YY1->TFCP2                                                               | 117 | 0.0076  |
| IGLV4-60 | HLA-DRA  | 1.89E-06 | 9.30E-05    | 0.342044612  | IGLV4-60->C1S->SERPING1->PLG->SERPINE1->PLAU->FOS->CREB1->CIITA->HLA-DRA                                         | 144 | 0.00765 |
| IGHD     | VNN2     | 3.61E-07 | 2.45E-05    | 0.363691974  | IGHD->GHRH->GCG->LEP->STAT3->IL6->ICAM1->ITGB2->VNN2                                                             | 201 | 0.00765 |
| SLC2A3   | LPHN2    | 2.10E-07 | 1.53E-05    | 0.370462482  | SLC2A3->SP1->SMAD3->TGFB1->FKBP1A->RYR1->HOMER1->SHANK2->LPHN2                                                   | 259 | 0.0077  |
| CASP1    | VNN2     | 8.97E-07 | 5.13E-05    | 0.351964601  | CASP1->IL18->IL1B->NFKB1->ICAM1->ITGB2->VNN2                                                                     | 166 | 0.0077  |
| SATB2    | KLRD1    | 8.98E-06 | 0.00032424  | -0.320011549 | SATB2->HOXA2->CD1D->B2M->CD8A->LCK->SYK->TYROBP->KLRD1                                                           | 104 | 0.0077  |
| SLC2A3   | NUPR1    | 1.85E-07 | 1.38E-05    | 0.371994379  | SLC2A3->SP1->TP53->NUPR1                                                                                         | 263 | 0.00775 |
| SLC2A3   | SNAPIN   | 3.53E-07 | 2.41E-05    | 0.363981086  | SLC2A3->SP1->TP53->PTEN->SLC9A3R1->CFTR->STX1A->SNAP25->SNAPIN                                                   | 210 | 0.0078  |
| ANGPTL4  | LMBR1L   | 1.34E-05 | 0.000450004 | 0.314072817  | ANGPTL4->LPL->APOE->APP->A2M->LYZ->LCN1->LMBR1L                                                                  | 96  | 0.008   |
| SERPINB2 | SLC25A11 | 5.87E-06 | 0.000233177 | 0.3261711    | SERPINB2->PLAU->JUN->MAPK8->TP53->BCL2->BNIP3->BCKDHB->DLD->OGDH->SLC25A11                                       | 113 | 0.00805 |
| CRB3     | DYNC1I2  | 1.90E-05 | 0.000594857 | -0.308794323 | CRB3->PARD6A->CDC42->IQGAP1->CLIP1->DCTN1-                                                                       | 89  | 0.0081  |

|          |          |          |             |              |                                                                                                       |     |         |
|----------|----------|----------|-------------|--------------|-------------------------------------------------------------------------------------------------------|-----|---------|
|          |          |          |             |              | >DCTN2->DYNC1I2                                                                                       |     |         |
| RNF43    | PIK3CG   | 4.89E-06 | 0.000200576 | -0.3288067   | RNF43->AKAP8L->DHX9->SF3A2->CD2BP2->CD2->LCK->LCP2->VAV1->RAC1->AKT1->PIK3CG                          | 117 | 0.0081  |
| TET3     | FPR1     | 8.25E-07 | 4.81E-05    | -0.353065607 | TET3->NANOG->KLF4->CTNNB1->GSK3B->TP53->NPM1->NCL->S100A11->ANXA1->FPR1                               | 177 | 0.00815 |
| NFIB     | NCOA7    | 1.67E-05 | 0.000536682 | 0.310702013  | NFIB->HNF1A->HNF4A->SMAD4->SMAD3->SP1->ESR1->NCOA7                                                    | 92  | 0.00815 |
| APOBEC1  | CCL18    | 1.92E-05 | 0.00059831  | -0.30864464  | APOBEC1->APOB->LDLR->APOE->APP->PSEN1->CTNNB1->BTRC->NFKBIA->NFKB1->CCL5->CCR3->CCL18                 | 90  | 0.0082  |
| ANGPTL4  | MID1     | 5.77E-06 | 0.00023006  | -0.326419119 | ANGPTL4->LPL->APOE->APP->PSEN1->CTNNB1->MYC->SP1->SMAD3->RUNX2->SP7->MID1                             | 114 | 0.00825 |
| CXCL14   | MARCKS   | 2.43E-06 | 0.000115125 | 0.338561971  | CXCL14->CXCR4->CD4->LCK->LCP2->GRB2->WASL->CDC42->PLD1->PRKCA->MARCKS                                 | 149 | 0.00825 |
| MAP7D1   | HAS2     | 2.97E-07 | 2.09E-05    | 0.366116774  | MAP7D1->ARTN->GFRA1->RET->SHC1->EGFR->STAT3->EP300->SMAD2->SMAD4->SMAD1->BMPR1A->BMP2->HAS2           | 248 | 0.00825 |
| SAV1     | MID1     | 3.46E-06 | 0.000151981 | -0.333677718 | SAV1->RASSF1->HRAS->RAF1->HSP90AA1->HIF1A->SP1->SMAD3->RUNX2->SP7->MID1                               | 133 | 0.0083  |
| TET3     | FCGR3B   | 7.14E-07 | 4.26E-05    | -0.354951043 | TET3->NANOG->KLF4->CTNNB1->ERBB2->EGFR->CBL->SYK->FCER1G->FCGR3B                                      | 191 | 0.00835 |
| UAP1L1   | A1CF     | 3.12E-07 | 2.18E-05    | -0.365504754 | UAP1L1->PGM3->GLO1->AKR1B1->DECR1->NCF2->RAC1->CTNNB1->PSEN1->APP->APOE->LDLR->APOB->APOBEC1->A1CF    | 250 | 0.00835 |
| RB1CC1   | CTSA     | 2.18E-05 | 0.000662507 | 0.306671714  | RB1CC1->PTK2->GRB2->MAPK1->MAP2K1->RAF1->YWHAZ->GP1BA->F2->GLA->GLB1->CTSA                            | 89  | 0.0084  |
| PTGER1   | CGGBP1   | 2.80E-06 | 0.000127693 | 0.336645879  | PTGER1->BDKRB2->KNG1->EGF->EGFR->STAT3->RAC1->NCKAP1->CYFIP1->FMR1->CGGBP1                            | 143 | 0.0084  |
| SERPINB2 | ST3GAL1  | 2.68E-06 | 0.000123488 | 0.337224585  | SERPINB2->PLAU->JUN->MAPK8->TP53->YBX1->SF3A2->SNRPE->LSM4->EXOSC10->CHPF->B4GALNT1->ST8SIA1->ST3GAL1 | 149 | 0.00845 |
| SERPINB2 | ENPP3    | 1.26E-05 | 0.000426426 | -0.315007984 | SERPINB2->PLAU->FOS->CSF2->CSF2RB->IL3->ENPP3                                                         | 105 | 0.00845 |
| PGRMC1   | GFPT1    | 3.34E-06 | 0.000147893 | 0.33417722   | PGRMC1->M6PR->PLIN3->IGF2R->PLAUR->PLAU->JUN->ATF3->ATF4->ASNS->GLUL->GFPT1                           | 140 | 0.0086  |
| SATB2    | SHANK2   | 2.07E-05 | 0.000633637 | 0.307492306  | SATB2->HOXA2->CD1D->B2M->CD8A->IL2->STAT3->EP300->SMAD2->TGFBFR1->FKBP1A->RYR1->HOMER1->SHANK2        | 93  | 0.00865 |
| EEF1B2   | MTMR3    | 8.93E-07 | 5.11E-05    | -0.35203409  | EEF1B2->RPL6->RPL5->MDM2->TP53->PTEN->INPP4B->MTMR3                                                   | 193 | 0.0087  |
| RPS2     | CRIM1    | 1.43E-05 | 0.000474091 | -0.313128764 | RPS2->RPS3->RPL5->MDM2->TP53->SP1->SMAD3->SMAD4->SMAD1->BMPR1A->BMP4->CRIM1                           | 106 | 0.0087  |
| CASP1    | SLA      | 5.77E-06 | 0.00023006  | 0.326432764  | CASP1->IL18->IL1B->IL8->RELA->HDAC1->TAL1->LMO2->LDB1->LHX3->IFT172->SLA                              | 125 | 0.0087  |
| IGLV4-60 | CD2      | 6.04E-06 | 0.000238992 | 0.325780519  | IGLV4-60->C1S->SERPING1->PLG->FN1->ITGA4->PXN->PTK2->GRB2->LCP2->LCK->CD2                             | 127 | 0.00875 |
| SERPINB2 | SCML1    | 4.95E-06 | 0.000203068 | -0.328610097 | SERPINB2->PLAU->NFKB1->RELA->HDAC1->SIN3A->MECP2->CDKL5->NHS->SCML1                                   | 132 | 0.0088  |
| MAP7D1   | HLA-DRA  | 5.42E-06 | 0.000219116 | 0.327330623  | MAP7D1->ARTN->GFRA1->RET->SHC1->EGFR->STAT3->EP300->CREB1->CIITA->HLA-DRA                             | 131 | 0.00885 |
| IGJ      | THEMIS   | 4.66E-07 | 3.02E-05    | 0.360452963  | IGJ->IL2->THEMIS                                                                                      | 241 | 0.00885 |
| SCEL     | TAX1BP3  | 5.25E-07 | 3.32E-05    | 0.358918935  | SCEL->TXNIP->TXN->MAP3K5->TRAF2->CHUK->RELA->EP300->STAT3->RAC1->ARHGDI2->RHOA->RTKN->TAX1BP3         | 229 | 0.0089  |
| IGJ      | TOX2     | 3.86E-07 | 2.57E-05    | 0.362851862  | IGJ->IL2->STAT3->EP300->TP53->BCL2->NR4A1->ZNF461->TOX2                                               | 261 | 0.0089  |
| FCRL5    | TNFRSF18 | 2.40E-05 | 0.000716063 | 0.30515857   | FCRL5->BCL9->CTNNB1->CCND1->STAT3->IL2->TNFRSF18                                                      | 95  | 0.00895 |
| EBI3     | SLA      | 8.06E-06 | 0.000298255 | 0.321594297  | EBI3->IL27RA->STAT1->EP300->MYOD1->TCF3->TAL1->LMO2->LDB1->LHX3->IFT172->SLA                          | 124 | 0.00905 |
| MAGT1    | SCML1    | 3.53E-07 | 2.41E-05    | 0.363954356  | MAGT1->DDOST->SSR4->RPS5->RPL5->MDM2->RB1->HDAC1->SIN3A->MECP2->CDKL5->NHS->SCML1                     | 276 | 0.00905 |
| SLC2A3   | UPP1     | 6.21E-07 | 3.79E-05    | 0.35675818   | SLC2A3->SP1->TP53->RRM2B->RRM1->RRM2->TYMS->TK1->CDA->TYMP->UPP1                                      | 228 | 0.0091  |
| CHRNA3   | CRIM1    | 5.31E-06 | 0.000215753 | 0.327615152  | CHRNA3->PSMA4->UCHL5->PSMD4->UBC->HIF1A->EP300-                                                       | 137 | 0.0091  |

|          |          |          |             |              |                                                                                                        |     |         |
|----------|----------|----------|-------------|--------------|--------------------------------------------------------------------------------------------------------|-----|---------|
|          |          |          |             |              | >SMAD2->SMAD4->SMAD1->BMMPR1A->BMP4->CRIM1                                                             |     |         |
| EEF1B2   | LTF      | 2.75E-05 | 0.000797609 | -0.303057591 | EEF1B2->RPL6->RPL5->MDM2->TP53->GSK3B->CTNNB1->PSEN1->APP->A2M->LYZ->LTF                               | 93  | 0.0092  |
| UAP1L1   | MID1     | 3.80E-07 | 2.55E-05    | -0.363024241 | UAP1L1->PGM3->GLO1->AKR1B1->DECR1->NCF2->RAC1->AKT1->ESR1->SP1->SMAD3->RUNX2->SP7->MID1                | 288 | 0.0092  |
| UAP1L1   | KLRD1    | 5.73E-07 | 3.55E-05    | 0.357802068  | UAP1L1->PGM3->GLO1->AKR1B1->DECR1->NCF2->RAC1->VAV1->SYK->TYROBP->KLRD1                                | 245 | 0.0092  |
| CEACAM1  | SLA      | 6.24E-06 | 0.000244812 | -0.325300362 | CEACAM1->PTPN11->GRB2->ERBB2->CTNNB1->TCF4->TAL1->LMO2->LDB1->LHX3->IFT172->SLA                        | 133 | 0.00925 |
| SATB2    | FPR1     | 1.23E-05 | 0.000419116 | -0.315331235 | SATB2->HOXA2->CD1D->B2M->CD8A->IL2->STAT3->EP300->TP53->NPM1->NCL->S100A11->ANXA1->FPR1                | 113 | 0.00925 |
| SLC2A3   | GNA11    | 1.16E-06 | 6.31E-05    | -0.348573118 | SLC2A3->SP1->EP300->JUN->EDN1->EDNRB->GNA11                                                            | 209 | 0.0093  |
| CXCL14   | SHANK2   | 3.57E-06 | 0.000155049 | 0.333221948  | CXCL14->CXCR4->ITCH->RNF11->SMURF2->SMAD2->TGFBF1->FKBP1A->RZR1->HOMER1->SHANK2                        | 160 | 0.00945 |
| IGLV4-60 | PIK3CG   | 8.37E-06 | 0.000307709 | 0.321042564  | IGLV4-60->C1S->SERPING1->PLG->FN1->ITGA4->PXN->ILK->AKT1->PIK3CG                                       | 130 | 0.00945 |
| SLC11A1  | ST3GAL1  | 3.76E-06 | 0.000161644 | 0.332521107  | SLC11A1->ZBTB17->MYC->EP300->TP53->YBX1->SF3A2->SNRPE->LSM4->EXOSC10->CHPF->B4GALNT1->ST8SIA1->ST3GAL1 | 152 | 0.00955 |
| GAS1     | CLEC4E   | 4.93E-07 | 3.16E-05    | 0.359723428  | GAS1->SHH->GLI2->BTRC->NFKBIA->IKKBK->BCL10->CARD9->CLEC4E                                             | 273 | 0.00955 |
| ZC3H12A  | DYNC1I2  | 3.42E-05 | 0.000948334 | -0.299633206 | ZC3H12A->CCL2->IL8->RELA->EP300->TP53->CHEK1->CDC25C->PLK1->NUDC->PAFAH1B1->DCTN1->DCTN2->DYNC1I2      | 95  | 0.00955 |
| SOX11    | CCL18    | 1.44E-06 | 7.51E-05    | 0.345720175  | SOX11->BNIP3->BCL2->TP53->HDAC1->RELA->NFKB1->CCL5->CCR3->CCL18                                        | 202 | 0.0096  |
| OXA1L    | SLC25A11 | 2.06E-06 | 9.96E-05    | 0.340871216  | OXA1L->BCL2->BNIP3->BCKDHB->DLD->OGDH->SLC25A11                                                        | 180 | 0.00965 |
| MAVS     | VNN2     | 2.96E-06 | 0.000134079 | -0.335862145 | MAVS->IRF3->CREBBP->RELA->NFKB1->ICAM1->ITGB2->VNN2                                                    | 167 | 0.00965 |
| IGJ      | SPINK5   | 8.56E-07 | 4.93E-05    | 0.352590004  | IGJ->IL2->STAT3->EGFR->PTPN1->CDH2->JUP->DSG1->KLK5->SPINK5                                            | 239 | 0.00975 |
| SAV1     | PIK3AP1  | 1.41E-05 | 0.000470655 | 0.313287011  | SAV1->RASSF1->HRAS->PIK3CA->PIK3R1->PIK3AP1                                                            | 114 | 0.0098  |
| RNF43    | DYNC1I2  | 2.58E-06 | 0.000120616 | 0.337753757  | RNF43->AKAP8L->DHX9->SF3A2->YBX1->TP53->CHEK2->CDC25C->PLK1->NUDC->PAFAH1B1->DCTN1->DCTN2->DYNC1I2     | 175 | 0.00985 |
| CHST2    | PIK3CG   | 6.39E-07 | 3.88E-05    | 0.356393217  | CHST2->SELL->CD34->MYB->CREBBP->CREB1->AKT1->PIK3CG                                                    | 260 | 0.0099  |
| PITX1    | GRSF1    | 9.56E-06 | 0.000340026 | 0.319093149  | PITX1->LHB->LHCGR->ARRB2->MAPK1->FOS->PTGS2->ALOX5->GPX4->GRSF1                                        | 133 | 0.00995 |
| TET3     | KCNQ2    | 2.85E-06 | 0.000129474 | -0.336387206 | TET3->NANOG->KLF4->CTNNB1->IQGAP1->CALM1->KCNQ2                                                        | 174 | 0.01    |
| NOP10    | SLA      | 1.19E-05 | 0.000408111 | 0.315809627  | NOP10->DKC1->RUVBL1->CTNNB1->TCF4->TAL1->LMO2->LDB1->LHX3->IFT172->SLA                                 | 126 | 0.01    |
| CXCL14   | BCL11A   | 1.56E-06 | 8.02E-05    | 0.34462473   | CXCL14->CXCR4->CD4->IFNG->IL2->STAT3->SRC->ESR1->NCOA2->BCL11A                                         | 209 | 0.01    |
| CEACAM1  | CRIM1    | 1.71E-05 | 0.000544834 | 0.310426382  | CEACAM1->PTPN11->JAK2->STAT3->EP300->SMAD2->SMAD4->SMAD1->BMMPR1A->BMP4->CRIM1                         | 112 | 0.01005 |
| CRB3     | GRSF1    | 2.90E-05 | 0.000834534 | 0.302234537  | CRB3->PARD6A->CDC42->IQGAP1->RAC1->STAT3->IL6->PTGS2->ALOX5->GPX4->GRSF1                               | 102 | 0.0101  |
| MAP7D1   | SHANK2   | 1.23E-05 | 0.000417408 | -0.315408476 | MAP7D1->ARTN->GFRA1->RET->GRB2->VAV1->RAC1->AKT1->MTOR->FKBP1A->RZR1->HOMER1->SHANK2                   | 128 | 0.0101  |
| COL8A1   | ZFHX3    | 2.07E-05 | 0.000634868 | 0.307434746  | COL8A1->COL8A2->ZEB1->CDH1->CTNNB1->MYC->MYB->ZFHX3                                                    | 110 | 0.0101  |
| SATB2    | FCGR3B   | 1.42E-05 | 0.00047124  | -0.313235547 | SATB2->HOXA2->CD1D->B2M->CD8A->LCK->SYK->FCER1G->FCGR3B                                                | 124 | 0.0103  |
| GAS1     | VNN2     | 3.42E-06 | 0.00015102  | 0.333825491  | GAS1->SHH->FGF8->FGFR1->FRS2->PTPN11->IL6ST->IL6->ICAM1->ITGB2->VNN2                                   | 173 | 0.01035 |
| RNF43    | ARHGEF19 | 8.49E-06 | 0.000310851 | 0.320834529  | RNF43->AKAP8L->DHX9->SF3A2->CD2BP2->CD2->LCK->LCP2->GRB2->ERBB2->CTNNB1->DVL1->DAAM1->ARHGEF19         | 142 | 0.01035 |
| SATB2    | CCL18    | 8.76E-06 | 0.000318939 | -0.3203726   | SATB2->HOXA2->CD1D->B2M->CD8A->CD4->CCR5->CCL13->CCR3->CCL18                                           | 140 | 0.01035 |

|          |          |          |             |              |                                                                                                                           |     |         |
|----------|----------|----------|-------------|--------------|---------------------------------------------------------------------------------------------------------------------------|-----|---------|
| PGRMC1   | A1CF     | 1.61E-05 | 0.000523368 | 0.311270698  | PGRMC1->M6PR->IGF1->IRS1->GRB2->ERBB2->CTNNB1->PSEN1->APP->APOE->DLR->APOB->APOBEC1->A1CF                                 | 117 | 0.0104  |
| SLC11A1  | VNN2     | 3.48E-06 | 0.000152609 | 0.333580729  | SLC11A1->ZBTB17->MYC->EP300->RELA->NFKB1->ICAM1->ITGB2->VNN2                                                              | 171 | 0.0104  |
| RNF43    | SLC25A11 | 1.76E-06 | 8.89E-05    | -0.342962611 | RNF43->AKAP8L->DHX9->SF3A2->YBX1->TP53->BCL2->BNIP3->BCKDHB->DLD->OGDH->SLC25A11                                          | 215 | 0.0104  |
| HLA-DQB2 | HLA-DRA  | 1.53E-05 | 0.000503985 | 0.312031317  | HLA-DQB2->ZFYVE9->SMAD2->EP300->CREB1->CIITA->HLA-DRA                                                                     | 123 | 0.01045 |
| UBXN7    | CD2      | 2.02E-06 | 9.81E-05    | -0.341135279 | UBXN7->CUL2->RBX1->CUL1->BTRC->NFKBIA->LCK->CD2                                                                           | 210 | 0.0105  |
| DDX47    | MARCKS   | 7.59E-07 | 4.49E-05    | -0.354149614 | DDX47->DNAH8->VCP->ATXN3->UBC->EGFR->GRB2->WASL->CDC42->PLD1->PRKCA->MARCKS                                               | 291 | 0.01055 |
| RB1CC1   | C18orf10 | 6.07E-06 | 0.000239818 | -0.325694458 | RB1CC1->PTK2->SRC->ESR1->EP300->RELA->NFKB1->C18orf10                                                                     | 161 | 0.0106  |
| NOP10    | CRIM1    | 3.55E-05 | 0.000974527 | -0.299056053 | NOP10->DKC1->RUVBL1->CTNNB1->SMAD4->SMAD1->BMPR1A->BMP4->CRIM1                                                            | 107 | 0.0106  |
| RNF43    | VPS4B    | 1.31E-05 | 0.000441317 | -0.314413427 | RNF43->AKAP8L->DHX9->SF3A2->YBX1->TP53->UBC->HGS->VPS4A->CHMP2A->VPS4B                                                    | 133 | 0.01065 |
| PGRMC1   | MID1     | 7.62E-06 | 0.000287177 | 0.322407365  | PGRMC1->M6PR->IGF1->IGF1R->ESR1->SP1->SMAD3->RUNX2->SP7->MID1                                                             | 153 | 0.0107  |
| MAGT1    | HMOX1    | 6.70E-06 | 0.00025921  | -0.324284042 | MAGT1->DDOST->SSR4->RPS5->RPL5->MDM2->TP53->HIF1A->HMOX1                                                                  | 157 | 0.0107  |
| UAP1L1   | SHANK2   | 1.58E-06 | 8.07E-05    | -0.344463882 | UAP1L1->PGM3->GLO1->AKR1B1->DECR1->NCF2->RAC1->AKT1->MTOR->FKBP1A->RYR1->HOMER1->SHANK2                                   | 232 | 0.0107  |
| CXCL14   | CTSA     | 2.58E-06 | 0.000120616 | 0.33773377   | CXCL14->CXCR4->CD4->CD8A->B2M->CD1D->CTSA                                                                                 | 202 | 0.01075 |
| SLC2A3   | SOCS7    | 1.85E-06 | 9.17E-05    | -0.342321349 | SLC2A3->SP1->ESR1->SRC->VCL->SORBS3->SOCS7                                                                                | 230 | 0.01095 |
| SATB2    | UPP1     | 1.95E-05 | 0.000609315 | -0.308350407 | SATB2->HOXA2->CD1D->B2M->CD8A->IL2->STAT3->EP300->TP53->RRM2B->RRM1->RRM2->TYMS->TK1->CDA->TYMP->UPP1                     | 119 | 0.01095 |
| SOX11    | SMAD7    | 1.43E-05 | 0.000475369 | 0.313072249  | SOX11->BNIP3->BCL2->TP53->EP300->SMAD2->TGFB1->SMAD7                                                                      | 134 | 0.01105 |
| CRB3     | ZMYM4    | 3.73E-06 | 0.000160668 | -0.332625532 | CRB3->PARD6A->CDC42->WASL->GRB2->FRS2->FGFR1->ZMYM4                                                                       | 179 | 0.01105 |
| MAP7D1   | CYP2J2   | 4.18E-06 | 0.000176829 | -0.331025812 | MAP7D1->ARTN->GFRA1->RET->SHC1->EGFR->UBC->TP53->KAT5->PLA2G4A->CYP2J2                                                    | 172 | 0.01105 |
| PGRMC1   | SLC25A11 | 3.47E-06 | 0.000152238 | -0.333634421 | PGRMC1->M6PR->IGF1->IRS1->MAPK8->TP53->BCL2->BNIP3->BCKDHB->DLD->OGDH->SLC25A11                                           | 189 | 0.0111  |
| MBNL2    | MED23    | 1.20E-05 | 0.000409891 | 0.315728469  | MBNL2->CCT3->PPP2CA->SGOL1->PLK1->CDC25C->CHEK2->BRCA1->ESR1->NCOA2->VDR->MED1->CDK8->MED23                               | 140 | 0.0111  |
| SLC2A3   | MID1     | 1.40E-06 | 7.37E-05    | -0.346042473 | SLC2A3->SP1->SMAD3->RUNX2->SP7->MID1                                                                                      | 254 | 0.0112  |
| RABGEF1  | ST3GAL1  | 9.85E-06 | 0.000349046 | -0.318640178 | RABGEF1->RABEP1->RAB5A->EGFR->GRB2->LCP2->LCK->CD2->CD2BP2->SF3A2->SNRPE->LSM4->EXOSC10->CHPF->B4GALNT1->ST8SIA1->ST3GAL1 | 152 | 0.01125 |
| CHRNA3   | RUNDC3A  | 1.28E-05 | 0.000431672 | 0.314792733  | CHRNA3->PSMA4->UCHL5->PSMD4->UBC->EGFR->NCK1->TNK1->RAP2A->RUNDC3A                                                        | 140 | 0.01125 |
| SLC22A18 | SLA      | 5.43E-06 | 0.000219116 | -0.327309623 | SLC22A18->CDKN1C->MYOD1->TCF3->TAL1->LMO2->LDB1->LHX3->IFT172->SLA                                                        | 174 | 0.0113  |
| MBNL2    | PREPL    | 3.33E-06 | 0.000147688 | 0.334216387  | MBNL2->CCT3->PPP2CA->SGOL1->PLK1->CDC25C->CHEK2->TP53->HDAC1->RELA->IKBK->PPM1B->PREPL                                    | 197 | 0.01135 |
| CD79A    | VNN2     | 7.27E-06 | 0.000276801 | 0.323083366  | CD79A->BLNK->GRB2->EGFR->STAT3->IL6->ICAM1->ITGB2->VNN2                                                                   | 166 | 0.0114  |
| UBQLN2   | SCML1    | 3.09E-06 | 0.000138906 | 0.335250114  | UBQLN2->PSMD4->UBC->TP53->HDAC1->SIN3A->MECP2->CDK5->NHS->SCML1                                                           | 206 | 0.01145 |
| IGLV4-60 | CD69     | 1.32E-05 | 0.00044404  | 0.314305129  | IGLV4-60->C1S->SERPING1->PLG->SERPINE1->PLAU->JUN->IL2->CD69                                                              | 142 | 0.01145 |
| ANGPTL4  | ST3GAL1  | 4.71E-06 | 0.000195337 | 0.329312252  | ANGPTL4->LPL->APOE->APP->PSEN1->CTNNB1->GSK3B->TP53->YBX1->SF3A2->SNRPE->LSM4->EXOSC10->CHPF->B4GALNT1->ST8SIA1->ST3GAL1  | 185 | 0.0116  |
| CXCL14   | GALNT1   | 4.80E-06 | 0.000197895 | -0.329052154 | CXCL14->CXCR4->CD4->LCK->CD2->CD2BP2->SF3A2->SNRPD3->LSM7->EXOSC6->CHPF->GALNT1                                           | 185 | 0.0116  |
| FCRL5    | APBB1IP  | 1.61E-05 | 0.000523368 | 0.311289771  | FCRL5->BCL9->CTNNB1->SRC->PTK2->TLN1->APBB1IP                                                                             | 134 | 0.01165 |
| MAP7D1   | SMAD7    | 3.13E-05 | 0.000880031 | 0.30105882   | MAP7D1->ARTN->GFRA1->RET->GRB2->ERBB2->CTNNB1-                                                                            | 113 | 0.01165 |

|          |          |          |             |              |                                                                                                                           |     |         |
|----------|----------|----------|-------------|--------------|---------------------------------------------------------------------------------------------------------------------------|-----|---------|
|          |          |          |             |              | >SMAD7                                                                                                                    |     |         |
| RNF43    | FCGR3B   | 9.87E-06 | 0.000349199 | -0.318616991 | RNF43->AKAP8L->DHX9->SF3A2->CD2BP2->CD2->LCK->SYK->FCER1G->FCGR3B                                                         | 158 | 0.01165 |
| SATB2    | VNN2     | 2.39E-06 | 0.000113505 | -0.338777614 | SATB2->HOXA2->CD1D->B2M->CD8A->IL2->STAT3->IL6->ICAM1->ITGB2->VNN2                                                        | 235 | 0.01165 |
| RNF43    | CTSA     | 7.02E-06 | 0.00026876  | 0.323599726  | RNF43->AKAP8L->DHX9->SF3A2->CD2BP2->CD2->LCK->CD8A->B2M->CD1D->CTSA                                                       | 170 | 0.0117  |
| SLC22A18 | MMD      | 2.73E-05 | 0.000792661 | -0.303183671 | SLC22A18->CDKN1C->CDK4->PCNA->CDT1->CDC6->MCM2->MUT->MMD                                                                  | 118 | 0.0118  |
| RNF43    | ASS1     | 2.24E-05 | 0.000677548 | -0.306235905 | RNF43->AKAP8L->DHX9->SF3A2->CD2BP2->CD2->LCK->LCP2->VAV1->RAC1->AKT1->NOS3->ARG2->OTC->ASS1                               | 127 | 0.0118  |
| PTGER3   | NUPR1    | 1.90E-05 | 0.000594744 | 0.308812573  | PTGER3->KNG1->EGF->EGFR->UBC->TP53->NUPR1                                                                                 | 133 | 0.0119  |
| CCL7     | CLEC4E   | 1.82E-06 | 9.11E-05    | 0.34256347   | CCL7->CCR1->CCL5->NFKB1->IKKBK->BCL10->CARD9->CLEC4E                                                                      | 266 | 0.01195 |
| MMP8     | FPR1     | 1.91E-05 | 0.00059831  | 0.308670801  | MMP8->TIMP2->MMP2->JUN->MAPK8->TP53->NPM1->NCL->S100A11->ANXA1->FPR1                                                      | 134 | 0.01205 |
| EEF1B2   | CTSA     | 3.65E-05 | 0.000993534 | -0.298597401 | EEF1B2->RPL6->RPL5->MDM2->AKT1->TSC2->YWHAZ->GP1BA->F2->GLA->GLB1->CTSA                                                   | 114 | 0.0121  |
| TET3     | GFPT1    | 4.52E-06 | 0.000189935 | 0.329899569  | TET3->NANOG->KLF4->CTNNB1->GSK3B->TP53->ATF3->ATF4->ASNS->GLUL->GFPT1                                                     | 198 | 0.0121  |
| CHST2    | GATA3    | 2.03E-06 | 9.86E-05    | 0.341034993  | CHST2->SELL->CD34->MYB->CREBBP->TP53->EP300->STAT3->IL2->IL5->GATA3                                                       | 260 | 0.01215 |
| MAP7D1   | GATA3    | 3.59E-05 | 0.00098161  | 0.29885108   | MAP7D1->ARTN->GFRA1->RET->SHC1->IL2->IL5->GATA3                                                                           | 116 | 0.01215 |
| IGKC     | SLA      | 1.52E-05 | 0.000499379 | 0.312185892  | IGKC->ERBB4->EGF->SRC->ESR1->BRCA1->RBBP8->LMO4->LDB1->LHX3->IFT172->SLA                                                  | 148 | 0.01225 |
| RNF4     | SLC25A3  | 2.60E-05 | 0.000763522 | 0.303956523  | RNF4->AR->NCOA3->EP300->TP53->APAF1->CYCS->CYC1->UQCRCF1->SLC25A3                                                         | 127 | 0.01235 |
| SLC2A3   | ESRRG    | 4.29E-06 | 0.000180974 | -0.330660142 | SLC2A3->SP1->TP53->SIRT1->PPARGC1A->ESRRG                                                                                 | 210 | 0.01255 |
| MMP8     | ESRRG    | 3.42E-05 | 0.000948334 | -0.299626799 | MMP8->TIMP2->MMP2->JUN->MAPK8->TP53->SIRT1->PPARGC1A->ESRRG                                                               | 122 | 0.01265 |
| JHDM1D   | SOS2     | 3.07E-06 | 0.000138454 | 0.335335458  | JHDM1D->MBD2->HDAC1->TP53->UBC->EGFR->GRB2->SOS2                                                                          | 248 | 0.0127  |
| PACS2    | GCLC     | 8.47E-06 | 0.000310627 | 0.320862266  | PACS2->CANX->CFTR->SLC9A3R1->PDGFRB->PIK3R2->IRS1->MAPK8->GSTP1->GSS->GCLC                                                | 184 | 0.0128  |
| PTGER1   | CYP2J2   | 3.06E-05 | 0.000869099 | -0.301383122 | PTGER1->BDKRB2->KNG1->EGF->EGFR->UBC->TP53->KAT5->PLA2G4A->CYP2J2                                                         | 126 | 0.01285 |
| MAP7D1   | ATP6V1E1 | 6.97E-06 | 0.000267263 | 0.323698451  | MAP7D1->ARTN->GFRA1->RET->SHC1->EGFR->UBC->RIPK1->TRAF2->TNFRSF11A->TNFSF11->TCIRG1->ATP6V1B1->ATP6V1D->ATP6V1A->ATP6V1E1 | 202 | 0.01305 |
| SAV1     | CRYZ     | 3.66E-05 | 0.000995043 | 0.298545733  | SAV1->RASSF1->HRAS->PIK3CA->AKT1->RAC1->NCF2->DECR1->CRYZ                                                                 | 128 | 0.0132  |
| UAP1L1   | HMOX1    | 5.99E-06 | 0.000237453 | 0.325891643  | UAP1L1->PGM3->GLO1->AKR1B1->DECR1->NCF2->RAC1->AKT1->HIF1A->HMOX1                                                         | 223 | 0.0132  |
| PARVA    | MTMR3    | 2.38E-05 | 0.000710912 | 0.305285146  | PARVA->ILK->PXN->PTK2->PTEN->INPP4B->MTMR3                                                                                | 144 | 0.01345 |
| CXCL14   | RBM39    | 1.25E-05 | 0.00042623  | 0.315051436  | CXCL14->CXCR4->CD4->LCK->CD2->CD2BP2->SF3A2->RBM39                                                                        | 177 | 0.0136  |
| SLC22A18 | CGGBP1   | 3.25E-05 | 0.000905063 | -0.300448107 | SLC22A18->CDKN1C->CDK4->CDKN1B->AKT1->RAC1->NCKAP1->CYFIP1->FMR1->CGGBP1                                                  | 135 | 0.01365 |
| EEF1B2   | CRIM1    | 2.05E-05 | 0.00063198  | -0.307577752 | EEF1B2->RPL6->RPL5->MDM2->TP53->SP1->SMAD3->SMAD4->SMAD1->BMPR1A->BMP4->CRIM1                                             | 152 | 0.0137  |
| IGLV4-60 | CXCL13   | 3.05E-05 | 0.000867406 | 0.301442273  | IGLV4-60->C1S->SERPING1->PLG->FN1->ITGA4->PXN->PTK2->GRB2->LCP2->LCK->CD4->CXCR4->CXCL13                                  | 137 | 0.01375 |
| RNF43    | ESRRG    | 3.57E-05 | 0.000977869 | 0.298960131  | RNF43->AKAP8L->DHX9->SF3A2->YBX1->TP53->SIRT1->PPARGC1A->ESRRG                                                            | 134 | 0.01385 |
| SLC2A3   | BCL11A   | 4.54E-06 | 0.000190213 | -0.329840798 | SLC2A3->SP1->ESR1->NCOA2->BCL11A                                                                                          | 250 | 0.014   |
| SLC2A3   | SHANK2   | 9.33E-06 | 0.000333629 | -0.319439964 | SLC2A3->SP1->SMAD3->TGFB1->FKBP1A->RYR1->HOMER1->SHANK2                                                                   | 203 | 0.014   |
| LEPRE1   | SLA      | 2.71E-05 | 0.00078953  | 0.303303481  | LEPRE1->PPIB->BSG->MMP1->JUN->MAPK8->TP53->BRCA1->RBBP8->LMO4->LDB1->LHX3->IFT172->SLA                                    | 144 | 0.014   |
| CDON     | HAS2     | 2.69E-05 | 0.000786562 | 0.30342045   | CDON->SHH->NOG->BMP2->HAS2                                                                                                | 143 | 0.014   |

|          |          |          |             |              |                                                                                                  |     |         |
|----------|----------|----------|-------------|--------------|--------------------------------------------------------------------------------------------------|-----|---------|
| MAP7D1   | VNN2     | 3.53E-06 | 0.000153911 | 0.333394025  | MAP7D1->ARTN->GFRA1->RET->SHC1->EGFR->STAT3->IL6->ICAM1->ITGB2->VNN2                             | 271 | 0.01405 |
| ADAMTS16 | LPHN2    | 9.01E-06 | 0.000324573 | 0.319962598  | ADAMTS16->EGR1->FOS->JUN->EP300->SMAD2->TGFB1->FKBP1A->RYR1->HOMER1->SHANK2->LPHN2               | 206 | 0.0141  |
| RB1CC1   | SCML1    | 2.51E-05 | 0.000741594 | 0.304512115  | RB1CC1->PTK2->PTEN->TP53->HDAC1->SIN3A->MECP2->CDK5->NHS->SCML1                                  | 153 | 0.0142  |
| UAP1L1   | SNAPIN   | 6.39E-06 | 0.000248793 | 0.324961151  | UAP1L1->PGM3->GNPNAT1->HK2->SLC2A4->STX4->SNAP25->SNAPIN                                         | 236 | 0.0142  |
| CXCL14   | RNF135   | 8.92E-06 | 0.000322994 | 0.320102052  | CXCL14->CXCR4->CD4->IFNG->IL18->IL1B->MYD88->IRF7->TBK1->IRF3->MAVS->DDX58->RNF135               | 213 | 0.0143  |
| SATB2    | SUV420H1 | 1.51E-05 | 0.000496952 | 0.312307154  | SATB2->HOXA2->CD1D->B2M->CD8A->IL2->STAT3->EP300->ESR1->NCOA2->SUV420H1                          | 178 | 0.01435 |
| UBXN7    | FCGR3B   | 4.56E-06 | 0.000190696 | -0.329785835 | UBXN7->CUL2->VHL->HIF1A->UBC->EGFR->CBL->SYK->FCER1G->FCGR3B                                     | 256 | 0.01445 |
| CHST2    | ITGA6    | 4.85E-06 | 0.00019956  | -0.328914288 | CHST2->SELL->CD34->MYB->CREBBP->TP53->PTEN->PTK2->PXN->ITGA4->ITGB1->ITGA6                       | 259 | 0.01445 |
| PSMB9    | MTMR3    | 2.99E-05 | 0.000855046 | -0.301739051 | PSMB9->PSMB7->UCHL5->PSMD4->UBC->TP53->PTEN->INPP4B->MTMR3                                       | 145 | 0.01445 |
| TET3     | CCL18    | 1.00E-05 | 0.000354731 | -0.318351538 | TET3->NANOG->KLF4->CTNNB1->BTRC->NFKBIA->NFKB1->CCL5->CCR3->CCL18                                | 210 | 0.0145  |
| RNF43    | CRYZ     | 1.67E-05 | 0.000534811 | -0.310786181 | RNF43->AKAP8L->DHX9->SF3A2->CD2BP2->CD2->LCK->LCP2->VAV1->RAC1->NCF2->DECR1->CRYZ                | 176 | 0.01475 |
| TET3     | RBM39    | 1.64E-05 | 0.000529655 | 0.311042587  | TET3->NANOG->KLF4->CTNNB1->GSK3B->TP53->YBX1->SF3A2->RBM39                                       | 179 | 0.0149  |
| RNF43    | RNF135   | 1.74E-05 | 0.000551754 | 0.310141543  | RNF43->AKAP8L->DHX9->SF3A2->YBX1->TP53->CREBBP->IRF3->MAVS->DDX58->RNF135                        | 178 | 0.015   |
| SATB2    | C18orf10 | 1.20E-05 | 0.000410265 | -0.315698562 | SATB2->HOXA2->CD1D->B2M->CD8A->LCK->NFKBIA->NFKB1->C18orf10                                      | 208 | 0.015   |
| PSMB9    | CLEC2D   | 5.37E-06 | 0.000217578 | 0.32746267   | PSMB9->PSMB7->UCHL5->PSMD4->UBC->RIPK1->TRAF2->TNFRSF11A->TNFSF11->CLEC2D                        | 269 | 0.01515 |
| CXCL14   | UPP1     | 1.59E-05 | 0.000518949 | -0.311477916 | CXCL14->CXCR4->CD4->IFNG->IL2->STAT3->EP300->TP53->RRM2B->RRM1->RRM2->TYMS->TK1->CDA->TYMP->UPP1 | 187 | 0.01525 |
| MAP7D1   | SCML1    | 9.45E-06 | 0.000336822 | -0.319249389 | MAP7D1->ARTN->GFRA1->RET->SHC1->EGFR->UBC->TP53->HDAC1->SIN3A->MECP2->CDK5->NHS->SCML1           | 236 | 0.01535 |
| UAP1L1   | BCL11A   | 5.70E-06 | 0.000227841 | -0.326613138 | UAP1L1->PGM3->GLO1->AKR1B1->DECR1->NCF2->RAC1->AKT1->ESR1->NCOA2->BCL11A                         | 282 | 0.01555 |
| NOP10    | CLEC4E   | 7.59E-06 | 0.000286296 | 0.322469636  | NOP10->DKC1->RUVBL1->CTNNB1->BTRC->NFKBIA->IKBK->BCL10->CARD9->CLEC4E                            | 269 | 0.016   |
| SCEL     | MMD      | 9.04E-06 | 0.000325423 | -0.319907275 | SCEL->TXNIP->TXN->MAP3K5->TRAF2->RIPK1->UBC->TP53->RPA1->RPA3->MCM2->MUT->MMD                    | 259 | 0.0162  |
| ANGPTL4  | SCML1    | 3.21E-05 | 0.000899085 | -0.300636938 | ANGPTL4->LPL->APOE->APP->PSEN1->CTNNB1->GSK3B->TP53->HDAC1->SIN3A->MECP2->CDK5->NHS->SCML1       | 168 | 0.01625 |
| RNF43    | SEMA4B   | 2.81E-05 | 0.000811673 | -0.30274118  | RNF43->AKAP8L->DHX9->SF3A2->CD2BP2->CD2->LCK->PTPRC->FYN->GRIN2A->DLG4->SEMA4B                   | 172 | 0.0163  |
| SLC2A3   | CD2      | 2.28E-05 | 0.000687117 | 0.305959824  | SLC2A3->SP1->EP300->STAT3->IL2->LCK->CD2                                                         | 191 | 0.01645 |
| TET3     | ARHGEF19 | 3.60E-05 | 0.00098161  | 0.298830361  | TET3->NANOG->KLF4->CTNNB1->DVL1->DAAM1->ARHGEF19                                                 | 169 | 0.01665 |
| SCEL     | CD55     | 1.33E-05 | 0.000446688 | 0.314199866  | SCEL->TXNIP->TXN->MAP3K5->TRAF2->RIPK1->UBC->EGFR->GRB2->VAV1->CD19->CR2->C3->CD55               | 244 | 0.0167  |
| CHST2    | KCNQ2    | 8.63E-06 | 0.000314975 | 0.320590117  | CHST2->SELL->CD34->MYB->CREBBP->CREB1->CAMK2B->CALM1->KCNQ2                                      | 286 | 0.0169  |
| PGRMC1   | SLA      | 2.32E-05 | 0.00069471  | -0.305730601 | PGRMC1->M6PR->IGF1->IGF1R->ESR1->BRCA1->RBBP8->LMO4->LDB1->LHX3->IFT172->SLA                     | 201 | 0.01725 |
| UBXN7    | BEX1     | 2.37E-05 | 0.000708215 | -0.305358767 | UBXN7->CUL2->VHL->HIF1A->UBC->EGFR->SHC1->NGFR->BEX1                                             | 212 | 0.018   |
| SAV1     | SCML1    | 3.64E-05 | 0.000990471 | -0.298674015 | SAV1->RASSF1->HRAS->PIK3CA->PTEN->TP53->HDAC1->SIN3A->MECP2->CDK5->NHS->SCML1                    | 187 | 0.018   |
| RNF43    | C18orf10 | 1.78E-05 | 0.000564015 | -0.309776023 | RNF43->AKAP8L->DHX9->SF3A2->CD2BP2->CD2->LCK->NFKBIA->NFKB1->C18orf10                            | 242 | 0.01815 |
| ANGPTL4  | VNN2     | 2.64E-05 | 0.000774518 | 0.303719309  | ANGPTL4->LPL->APOE->APP->PSEN1->CTNNB1->BTRC->NFKBIA->NFKB1->ICAM1->ITGB2->VNN2                  | 204 | 0.01825 |
| SLC2A3   | ABC1     | 2.22E-05 | 0.000672361 | -0.306414197 | SLC2A3->SP1->TP53->ABC1                                                                          | 226 | 0.01835 |

|         |         |          |             |              |                                                                                                      |     |         |
|---------|---------|----------|-------------|--------------|------------------------------------------------------------------------------------------------------|-----|---------|
| PTGER1  | HAS2    | 3.07E-05 | 0.000869802 | 0.301356166  | PTGER1->BDKRB2->KNG1->EGF->SRC->ESR1->EP300->SMAD2->SMAD4->SMAD1->BMPR1A->BMP2->HAS2                 | 202 | 0.01855 |
| CHST2   | SNAPIN  | 1.40E-05 | 0.000466868 | 0.31343989   | CHST2->SELL->CD34->MYB->CREBBP->TP53->PTEN->SLC9A3R1->CFTR->STX1A->SNAP25->SNAPIN                    | 277 | 0.01865 |
| UBXN7   | HMOX1   | 3.56E-05 | 0.00097482  | -0.299023683 | UBXN7->CUL2->VHL->HIF1A->HMOX1                                                                       | 208 | 0.0193  |
| MMP8    | KANK4   | 3.26E-05 | 0.000908505 | 0.300374248  | MMP8->TIMP2->MMP2->JUN->MAPK8->TP53->TBP->POLR2A->POLR2H->POLR3D->POLR3F->POLR3C->KANK4              | 219 | 0.01955 |
| UAP1L1  | RBM39   | 2.05E-05 | 0.000629688 | -0.307648646 | UAP1L1->PGM3->GLO1->AKR1B1->DECR1->NCF2->RAC1->VAV1->LCP2->LCK->CD2->CD2BP2->SF3A2->RBM39            | 254 | 0.01955 |
| GAS1    | TOX2    | 3.53E-05 | 0.00097178  | 0.299149852  | GAS1->SHH->FGF8->FGFR1->FRS2->GRB2->VAV1->RAC1->AKT1->NR4A1->ZNF461->TOX2                            | 215 | 0.0197  |
| EBI3    | CLEC2D  | 1.96E-05 | 0.000611367 | 0.308283654  | EBI3->IL27RA->STAT1->EP300->RELA->CHUK->TRAF2->TNFRSF11A->TNFSF11->CLEC2D                            | 270 | 0.02025 |
| PITX1   | DNAJB8  | 3.04E-05 | 0.000865461 | 0.301491816  | PITX1->LHB->LHCGR->ARRB2->MAPK1->MYC->EP300->MEF2D->HDAC4->DNAJB8                                    | 240 | 0.0206  |
| UBE2CBP | SYTL3   | 3.48E-05 | 0.000962883 | 0.299344     | UBE2CBP->UBE2C->BUB1B->CCNB1->CDC25C->CHEK1->TP53->PTEN->SLC9A3R1->CFTR->STX1A->SYTL4->RAB27A->SYTL3 | 240 | 0.021   |
| EBI3    | SLC39A2 | 3.02E-05 | 0.00086087  | 0.301618215  | EBI3->IL27RA->STAT1->EP300->CREB1->CAMK2B->GRIN2B->DLG4->KCNA4->KCNA2->SLC39A2                       | 266 | 0.0221  |
| APOBEC1 | CLEC4E  | 2.83E-05 | 0.000817135 | -0.302593386 | APOBEC1->APOB->LDLR->APOE->APP->PSEN1->CTNNB1->BTRC->NFKBIA->IKBK->BCL10->CARD9->CLEC4E              | 280 | 0.02225 |

Table S4 - The 473 transition genes and the number of signal propagation paths crossed it

| Transition gene name | Number of signal propagation paths crossed it |
|----------------------|-----------------------------------------------|
| TP53                 | 139                                           |
| CTNNB1               | 100                                           |
| EP300                | 94                                            |
| GRB2                 | 85                                            |
| STAT3                | 83                                            |
| LCK                  | 82                                            |
| IL2                  | 79                                            |
| EGFR                 | 74                                            |
| UBC                  | 66                                            |
| SF3A2                | 53                                            |
| APP                  | 48                                            |
| AKT1                 | 47                                            |
| CD8A                 | 47                                            |
| PSEN1                | 46                                            |
| APOE                 | 45                                            |
| CD4                  | 45                                            |
| RAC1                 | 44                                            |
| SYK                  | 43                                            |
| SP1                  | 41                                            |
| AKAP8L               | 38                                            |
| DHX9                 | 38                                            |
| LCP2                 | 37                                            |
| ESR1                 | 36                                            |
| ERBB2                | 35                                            |
| JUN                  | 34                                            |
| CREB1                | 33                                            |
| CD2                  | 32                                            |
| CD2BP2               | 32                                            |
| CREBBP               | 31                                            |
| SRC                  | 31                                            |
| EGF                  | 30                                            |
| NFKB1                | 29                                            |
| PSMD4                | 28                                            |
| RET                  | 27                                            |
| CXCR4                | 26                                            |
| HIF1A                | 26                                            |
| RELA                 | 26                                            |
| SHC1                 | 26                                            |
| UCHL5                | 26                                            |



|        |    |
|--------|----|
| VAV1   | 26 |
| SHH    | 25 |
| ARTN   | 24 |
| CD1D   | 24 |
| GFRA1  | 24 |
| IFNG   | 24 |
| LPL    | 24 |
| PLAU   | 24 |
| APOB   | 23 |
| B2M    | 23 |
| MAPK8  | 23 |
| CBL    | 22 |
| FKBP1A | 22 |
| HOMER1 | 22 |
| HOXA2  | 22 |
| LDLR   | 22 |
| NFKBIA | 22 |
| PTPN11 | 22 |
| RYR1   | 22 |
| STAT1  | 22 |
| YBX1   | 22 |
| DKC1   | 21 |
| HDAC1  | 21 |
| KNG1   | 21 |
| MYC    | 21 |
| PSMB7  | 21 |
| IFT172 | 20 |
| NCOA2  | 20 |
| PTK2   | 20 |
| SMAD2  | 20 |
| SMAD4  | 20 |
| IL18   | 19 |
| LDB1   | 19 |
| LHX3   | 19 |
| CCR3   | 18 |
| CCR5   | 18 |
| CIITA  | 18 |
| FCER1G | 18 |
| FGF8   | 18 |
| FGFR1  | 18 |
| TRAF2  | 18 |

|         |    |
|---------|----|
| APOBEC1 | 17 |
| MYB     | 17 |
| SMAD1   | 17 |
| BCL2    | 16 |
| BDKRB2  | 16 |
| BMPR1A  | 16 |
| GSK3B   | 16 |
| IRF3    | 16 |
| PTEN    | 16 |
| SIN3A   | 16 |
| TGFBR1  | 16 |
| ZBTB17  | 16 |
| CDC42   | 15 |
| MDM2    | 15 |
| RUVBL1  | 15 |
| TYROBP  | 15 |
| BLNK    | 14 |
| BMP4    | 14 |
| BTRC    | 14 |
| CALM1   | 14 |
| GHRH    | 14 |
| HRAS    | 14 |
| ITGB2   | 14 |
| KAT5    | 14 |
| M6PR    | 14 |
| SMAD3   | 14 |
| ANXA1   | 13 |
| CCL5    | 13 |
| GCG     | 13 |
| ICAM1   | 13 |
| IL6     | 13 |
| LEP     | 13 |
| MAPK1   | 13 |
| NCL     | 13 |
| NPM1    | 13 |
| PIK3R1  | 13 |
| S100A11 | 13 |
| CD34    | 12 |
| CDA     | 12 |
| CDKL5   | 12 |
| DECR1   | 12 |

|           |    |
|-----------|----|
| ERBB4     | 12 |
| IL27RA    | 12 |
| LMO2      | 12 |
| MECP2     | 12 |
| NCF2      | 12 |
| NHS       | 12 |
| PRKCA     | 12 |
| RRM1      | 12 |
| RRM2      | 12 |
| RRM2B     | 12 |
| SELL      | 12 |
| TAL1      | 12 |
| TK1       | 12 |
| TYMP      | 12 |
| TYMS      | 12 |
| IGF1      | 11 |
| IRS1      | 11 |
| PLCG1     | 11 |
| RASSF1    | 11 |
| RPL5      | 11 |
| RUNX2     | 11 |
| SP7       | 11 |
| BCL9      | 10 |
| BNIP3     | 10 |
| CDC25C    | 10 |
| CFTR      | 10 |
| CHUK      | 10 |
| DAAM1     | 10 |
| DVL1      | 10 |
| IQGAP1    | 10 |
| JAK2      | 10 |
| MTOR      | 10 |
| PLD1      | 10 |
| PLK1      | 10 |
| SHANK2    | 10 |
| SLC9A3R1  | 10 |
| TNFRSF11A | 10 |
| TNFSF11   | 10 |
| BCL10     | 9  |
| CARD9     | 9  |
| PLA2G4A   | 9  |

|          |   |
|----------|---|
| SNAP25   | 9 |
| STX1A    | 9 |
| BRCA1    | 8 |
| CAMK2B   | 8 |
| CCND1    | 8 |
| CHPF     | 8 |
| FRS2     | 8 |
| IGF1R    | 8 |
| KLF4     | 8 |
| NANOG    | 8 |
| PGM3     | 8 |
| PXN      | 8 |
| RIPK1    | 8 |
| YY1      | 8 |
| A2M      | 7 |
| AKR1B1   | 7 |
| AR       | 7 |
| ASNS     | 7 |
| ATF3     | 7 |
| ATF4     | 7 |
| CDKN1C   | 7 |
| CHEK2    | 7 |
| GLO1     | 7 |
| GLUL     | 7 |
| IL1B     | 7 |
| LMO4     | 7 |
| PIK3CA   | 7 |
| PPARGC1A | 7 |
| RBBP8    | 7 |
| SIRT1    | 7 |
| SOS1     | 7 |
| TERT     | 7 |
| ARRB2    | 6 |
| BCKDHB   | 6 |
| BSG      | 6 |
| CCL13    | 6 |
| CD79A    | 6 |
| DLD      | 6 |
| EDNRB    | 6 |
| EXOSC10  | 6 |
| ILK      | 6 |

|          |   |
|----------|---|
| ITGA4    | 6 |
| LHB      | 6 |
| LHCGR    | 6 |
| LSM4     | 6 |
| LYZ      | 6 |
| MMP1     | 6 |
| MYOD1    | 6 |
| NR4A1    | 6 |
| OGDH     | 6 |
| PARD6A   | 6 |
| PDGFRB   | 6 |
| PLG      | 6 |
| POLR2A   | 6 |
| POLR2H   | 6 |
| POLR3C   | 6 |
| POLR3D   | 6 |
| POLR3F   | 6 |
| PPIB     | 6 |
| PPP2CA   | 6 |
| PTGS2    | 6 |
| RAF1     | 6 |
| RPL6     | 6 |
| SGOL1    | 6 |
| SNRPE    | 6 |
| TBP      | 6 |
| TLN1     | 6 |
| B4GALNT1 | 5 |
| C1S      | 5 |
| C3       | 5 |
| CD19     | 5 |
| CDH2     | 5 |
| CR2      | 5 |
| DCTN1    | 5 |
| DCTN2    | 5 |
| FN1      | 5 |
| FOS      | 5 |
| HNF1A    | 5 |
| HNF4A    | 5 |
| IFNGR1   | 5 |
| IKBKB    | 5 |
| IKBKG    | 5 |

|          |   |
|----------|---|
| JUP      | 5 |
| KRAS     | 5 |
| PSMA4    | 5 |
| SERPING1 | 5 |
| ST8SIA1  | 5 |
| TCF4     | 5 |
| WASL     | 5 |
| ARHGDI1  | 4 |
| ATP6V1A  | 4 |
| ATP6V1B1 | 4 |
| ATP6V1D  | 4 |
| BMP2     | 4 |
| CDK4     | 4 |
| CHEK1    | 4 |
| CUL2     | 4 |
| DSG1     | 4 |
| F2       | 4 |
| GLA      | 4 |
| GLB1     | 4 |
| GP1BA    | 4 |
| HDAC9    | 4 |
| IL3      | 4 |
| IL5      | 4 |
| INPP4B   | 4 |
| ITGB1    | 4 |
| KLK5     | 4 |
| MAPK14   | 4 |
| MAPKAPK2 | 4 |
| MMP2     | 4 |
| NCOA3    | 4 |
| NGFR     | 4 |
| NUDC     | 4 |
| PAFAH1B1 | 4 |
| PRTN3    | 4 |
| RB1      | 4 |
| RHOA     | 4 |
| SRF      | 4 |
| TCF3     | 4 |
| TCIRG1   | 4 |
| TIMP2    | 4 |
| YWHAZ    | 4 |

|          |   |
|----------|---|
| ZNF461   | 4 |
| ACO2     | 3 |
| ARG2     | 3 |
| CCT3     | 3 |
| CDH1     | 3 |
| COL4A3   | 3 |
| COL4A4   | 3 |
| CS       | 3 |
| CYFIP1   | 3 |
| DDOST    | 3 |
| EDN1     | 3 |
| ELK1     | 3 |
| FH       | 3 |
| FMR1     | 3 |
| GDNF     | 3 |
| GLI2     | 3 |
| HSP90AA1 | 3 |
| IGBP1    | 3 |
| IGF2R    | 3 |
| IL8      | 3 |
| KLKB1    | 3 |
| LRP6     | 3 |
| LSM7     | 3 |
| MAP3K5   | 3 |
| MCM2     | 3 |
| MDH2     | 3 |
| MUT      | 3 |
| NCKAP1   | 3 |
| NOS3     | 3 |
| OTC      | 3 |
| PITX2    | 3 |
| PLAUR    | 3 |
| PLIN3    | 3 |
| POMC     | 3 |
| PTPN6    | 3 |
| RAB5A    | 3 |
| RABEP1   | 3 |
| RPS5     | 3 |
| RTKN     | 3 |
| SDHB     | 3 |
| SNRPD3   | 3 |

|         |   |
|---------|---|
| SPI1    | 3 |
| SSR4    | 3 |
| SUCLG1  | 3 |
| TGFB1   | 3 |
| TSC2    | 3 |
| TXN     | 3 |
| TXNIP   | 3 |
| TXNL4A  | 3 |
| VCL     | 3 |
| VHL     | 3 |
| ZFYVE9  | 3 |
| ADCYAP1 | 2 |
| ALOX5   | 2 |
| APAF1   | 2 |
| ARHGEF7 | 2 |
| AXIN1   | 2 |
| BNIP2   | 2 |
| CCL2    | 2 |
| CCR1    | 2 |
| CDC6    | 2 |
| CDKN1B  | 2 |
| COL8A2  | 2 |
| CSF2RB  | 2 |
| CXCR3   | 2 |
| DDX58   | 2 |
| DLG4    | 2 |
| EXOSC6  | 2 |
| GJA1    | 2 |
| GMPS    | 2 |
| GPX4    | 2 |
| IMPDH2  | 2 |
| LCN1    | 2 |
| MAVS    | 2 |
| MYBPC3  | 2 |
| MYH6    | 2 |
| NCK1    | 2 |
| NOG     | 2 |
| PCNA    | 2 |
| PICK1   | 2 |
| PTGDS   | 2 |
| RAP2A   | 2 |



|           |   |
|-----------|---|
| RPS3      | 2 |
| SERPINE1  | 2 |
| TNIK      | 2 |
| TNNT2     | 2 |
| TPM1      | 2 |
| USP7      | 2 |
| VIPR1     | 2 |
| ZEB1      | 2 |
| ADCYAP1R1 | 1 |
| APBB1     | 1 |
| ATF2      | 1 |
| ATXN3     | 1 |
| BUB1B     | 1 |
| CANX      | 1 |
| CASP3     | 1 |
| CCL11     | 1 |
| CCNB1     | 1 |
| CD28      | 1 |
| CD80      | 1 |
| CDH5      | 1 |
| CDK2      | 1 |
| CDK8      | 1 |
| CDS2      | 1 |
| CDT1      | 1 |
| CHMP2A    | 1 |
| CLIP1     | 1 |
| CLSPN     | 1 |
| COPB1     | 1 |
| COPB2     | 1 |
| CSF2      | 1 |
| CTNNA1    | 1 |
| CUL1      | 1 |
| CXCL9     | 1 |
| CYC1      | 1 |
| CYCS      | 1 |
| DNAH8     | 1 |
| DSP       | 1 |
| EGR1      | 1 |
| FGF23     | 1 |
| FGFR2     | 1 |
| FYN       | 1 |

|          |   |
|----------|---|
| GADD45G  | 1 |
| GALNT3   | 1 |
| GCNT1    | 1 |
| GIT1     | 1 |
| GNB2L1   | 1 |
| GNPNAT1  | 1 |
| GRIN2A   | 1 |
| GRIN2B   | 1 |
| GSS      | 1 |
| GSTP1    | 1 |
| GZMB     | 1 |
| HDAC4    | 1 |
| HGS      | 1 |
| HK2      | 1 |
| IL6ST    | 1 |
| IRF7     | 1 |
| ITCH     | 1 |
| ITGA8    | 1 |
| KCNA4    | 1 |
| KCNAB2   | 1 |
| LSM1     | 1 |
| MAP2K1   | 1 |
| MAPK3    | 1 |
| MBD2     | 1 |
| MED1     | 1 |
| MEF2D    | 1 |
| MRVI1    | 1 |
| MYD88    | 1 |
| NTRK1    | 1 |
| PAK1     | 1 |
| PIK3R2   | 1 |
| PPM1B    | 1 |
| PPP1R12A | 1 |
| PRKCE    | 1 |
| PRKG1    | 1 |
| PRKG2    | 1 |
| PTPN1    | 1 |
| PTPRC    | 1 |
| RAB27A   | 1 |
| RBBP4    | 1 |
| RBX1     | 1 |

|         |   |
|---------|---|
| RFXANK  | 1 |
| RNF11   | 1 |
| ROCK2   | 1 |
| RPA1    | 1 |
| RPA3    | 1 |
| SELE    | 1 |
| SELPLG  | 1 |
| SLC2A4  | 1 |
| SMAD7   | 1 |
| SMURF2  | 1 |
| SORBS3  | 1 |
| STX4    | 1 |
| SYTL4   | 1 |
| TBK1    | 1 |
| TGFBI   | 1 |
| TIMP1   | 1 |
| UBE2C   | 1 |
| UPF1    | 1 |
| UPF2    | 1 |
| UQCRCF1 | 1 |
| VCP     | 1 |
| VDR     | 1 |
| VPS4A   | 1 |
| ZAP70   | 1 |
